# Supplementary material for: Facile hydrothermal synthesis of N-doped fluorescent carbon dots for selective detection of insecticide parathion
Source: Royal Society of Chemistry journal article supplement (doi:10.1039/d3ay00124e), 2023-01-01
Supplement: d3ay00124e1.xlsx [file d3ay00124e1.xlsx]

## Sheet: Abs Ex Em
Labels	Ex	Em	Labels	TransScan1 Absorption CDs
300	35858.6		200	0.85054
301	37630		201	0.87841
302	39450.2		202	0.91283
303	41316.5		203	0.9453
304	43167.1		204	0.98541
305	44911.7		205	1.00262
306	46474.6		206	1.02474
307	47824.3		207	1.00926
308	48972.7		208	0.99896
309	49958.1		209	0.97833
310	50841.9		210	0.94641
311	51717.1		211	0.92853
312	52692.5		212	0.91177
313	53839.9		213	0.90673
314	55164.9		214	0.91666
315	56666.4		215	0.93486
316	58398.9		216	0.95725
317	60419.4		217	0.99343
318	62701.4		218	1.03636
319	65152.8		219	1.08633
320	67686.9		220	1.1384
321	70250.2		221	1.18841
322	72811		222	1.24034
323	75346.6		223	1.29753
324	77835.1		224	1.35555
325	80233.5		225	1.40647
326	82465.3		226	1.46658
327	84452.8		227	1.51908
328	86164.1		228	1.56332
329	87632.8		229	1.6149
330	88941		230	1.64537
331	90169.3		231	1.68788
332	91346		232	1.72917
333	92447.4		233	1.76046
334	93424		234	1.77979
335	94204.1		235	1.81681
336	94706		236	1.82357
337	94871.2		237	1.8475
338	94653.5		238	1.85923
339	93989.9		239	1.87162
340	92846.8		240	1.88278
341	91278.5		241	1.89095
342	89381.5		242	1.90112
343	87208		243	1.88949
344	84766.3		244	1.8774
345	82087.2		245	1.86784
346	79255.5		246	1.85737
347	76387.7		247	1.82974
348	73582.3		248	1.80519
349	70885.9		249	1.76272
350	68315.3		250	1.71161
351	65900.9		251	1.65653
352	63681.3		252	1.59382
353	61670.3		253	1.52749
354	59872.3		254	1.45306
355	58307.4		255	1.37365
356	56965.9		256	1.29121
357	55754.8		257	1.20667
358	54576.6		258	1.12219
359	53460.6		259	1.03882
360	52546.8		260	0.96333
361	51934.9		261	0.88868
362	51589.1		262	0.82173
363	51385.7		263	0.75908
364	51206.6		264	0.70053
365	50985.2		265	0.64617
366	50700.1		266	0.59764
367	50348.6		267	0.5535
368	49920.2		268	0.5131
369	49388.2		269	0.47699
370	48725.6		270	0.44713
371	47938.1		271	0.4196
372	47074.8		272	0.39726
373	46193.4		273	0.37709
374	45319.5		274	0.36019
375	44452.9		275	0.34809
376	43605.4		276	0.33754
377	42817.8		277	0.33008
378	42135.2		278	0.32613
379	41570.5		279	0.32099
380	41085.2		280	0.31913
381			281	0.3174
382			282	0.31652
383			283	0.31813
384			284	0.31996
385			285	0.32177
386			286	0.32552
387			287	0.32936
388			288	0.33293
389			289	0.33612
390		5611.04	290	0.34188
391		6630.07	291	0.34687
392		7811.76	292	0.3507
393		9247.89	293	0.35549
394		10961.5	294	0.36063
395		12949.8	295	0.36304
396		15199.9	296	0.36713
397		17692.9	297	0.37095
398		20426.3	298	0.37276
399		23409.9	299	0.37548
400		26627.9	300	0.37617
401		30029.6	301	0.37665
402		33559.1	302	0.37667
403		37181.8	303	0.37509
404		40881	304	0.37394
405		44639.1	305	0.37176
406		48417.6	306	0.36695
407		52131.6	307	0.36251
408		55655.5	308	0.35747
409		58920.9	309	0.3512
410		62009.3	310	0.344
411		65082.4	311	0.33465
412		68219.6	312	0.32588
413		71376.2	313	0.31634
414		74480.6	314	0.30653
415		77510.6	315	0.29643
416		80472.8	316	0.28508
417		83358.1	317	0.27486
418		86143.4	318	0.26383
419		88815	319	0.25259
420		91383.7	320	0.24328
421		93874.4	321	0.23279
422		96289.9	322	0.22203
423		98615.1	323	0.21277
424		100861	324	0.20352
425		103050	325	0.19396
426		105176	326	0.18463
427		107220	327	0.17567
428		109168	328	0.16739
429		110980	329	0.16033
430		112598	330	0.15569
431		114015	331	0.14852
432		115295	332	0.14264
433		116484	333	0.13976
434		117546	334	0.13434
435		118400	335	0.13191
436		119030	336	0.12823
437		119497	337	0.12468
438		119860	338	0.12346
439		120108	339	0.1213
440		120178	340	0.11849
441		120022	341	0.11716
442		119656	342	0.11614
443		119168	343	0.11389
444		118654	344	0.11343
445		118127	345	0.11254
446		117540	346	0.11059
447		116865	347	0.10882
448		116101	348	0.10929
449		115231	349	0.10749
450		114245	350	0.1065
451		113175	351	0.10629
452		112063	352	0.10541
453		110923	353	0.10539
454		109739	354	0.10602
455		108498	355	0.10641
456		107211	356	0.10559
457		105911	357	0.10548
458		104604	358	0.10793
459		103250	359	0.10783
460		101801	360	0.10738
461		100263	361	0.10901
462		98700.9	362	0.10943
463		97174.2	363	0.10836
464		95673.9	364	0.11032
465		94144.8	365	0.11041
466		92564.1	366	0.10995
467		90962.9	367	0.11201
468		89392.7	368	0.11171
469		87890.2	369	0.11188
470		86442.4	370	0.11364
471		84978	371	0.11309
472		83428.4	372	0.11253
473		81783.1	373	0.11308
474		80071.6	374	0.11321
475		78334.7	375	0.11223
476		76626.5	376	0.11267
477		74980.4	377	0.11304
478		73373	378	0.11202
479		71768.7	379	0.11276
480		70162.2	380	0.11186
481		68554.5	381	0.11114
482		66947.6	382	0.11194
483		65373.2	383	0.11131
484		63879.2	384	0.10973
485		62472.3	385	0.10986
486		61086.5	386	0.11009
487		59640.3	387	0.1085
488		58132.8	388	0.10789
489		56633.8	389	0.10689
490		55191.4	390	0.10489
491		53809.5	391	0.10424
492		52475.7	392	0.10325
493		51160.8	393	0.10059
494		49841.2	394	0.10026
495		48533.6	395	0.09935
496		47258.7	396	0.09754
497		45996.5	397	0.0974
498		44717.7	398	0.09561
499		43435.1	399	0.09337
500		42194.3	400	0.09311
501		41013.9	401	0.09144
502		39853.1	402	0.09028
503		38665.3	403	0.08873
504		37471.9	404	0.087
505		36333.7	405	0.0876
506		35269.5	406	0.08548
507		34248.9	407	0.08457
508		33241.3	408	0.08441
509		32231.9	409	0.08198
510		31223.6	410	0.08063
511		30247.3	411	0.07848
512		29340.1	412	0.07835
513		28500.1	413	0.07775
514		27691.8	414	0.07543
515		26892.2	415	0.07529
516		26098.8	416	0.07467
517		25304.4	417	0.07251
518		24498	418	0.07195
519		23685.1	419	0.07087
520		22888.9	420	0.06947
521		22132.6	421	0.06923
522		21422.3	422	0.06827
523		20749.7	423	0.0666
524		20107	424	0.06556
525		19490.4	425	0.06553
526		18894.7	426	0.06369
527		18317.5	427	0.06238
528		17756.4	428	0.06254
529		17202.6	429	0.05991
530		16650.5	430	0.05879
531		16107	431	0.05784
532		15583.4	432	0.05535
533		15084.2	433	0.05507
534		14602.8	434	0.05373
535		14133.6	435	0.0521
536		13684.7	436	0.05193
537		13257.3	437	0.05067
538		12832.3	438	0.0487
539		12402.1	439	0.04739
540		11987.7	440	0.04817
541		11607.4	441	0.04514
542		11259.2	442	0.04399
543		10929.8	443	0.0449
544		10599.5	444	0.04276
545		10259.7	445	0.04104
546		9928.95	446	0.04095
547		9626.65	447	0.03906
548		9338.21	448	0.03789
549		9031.4	449	0.03665
550		8698.77	450	0.03514
			451	0.03506
			452	0.03387
			453	0.03242
			454	0.03176
			455	0.03138
			456	0.03054
			457	0.02958
			458	0.02885
			459	0.0288
			460	0.02742
			461	0.02651
			462	0.02702
			463	0.02593
			464	0.02574
			465	0.02701
			466	0.0243
			467	0.02447
			468	0.0253
			469	0.02401
			470	0.02284
			471	0.02291
			472	0.02216
			473	0.02232
			474	0.02141
			475	0.02105
			476	0.02085
			477	0.01976
			478	0.01966
			479	0.01992
			480	0.01914
			481	0.01924
			482	0.01919
			483	0.01759
			484	0.01773
			485	0.01719
			486	0.01604
			487	0.0167
			488	0.01643
			489	0.01688
			490	0.01623
			491	0.01512
			492	0.01573
			493	0.01482
			494	0.0137
			495	0.01474
			496	0.01479
			497	0.01397
			498	0.01459
			499	0.01332
			500	0.01322
			501	0.01358
			502	0.01334
			503	0.01347
			504	0.01328
			505	0.0131
			506	0.0126
			507	0.01288
			508	0.01295
			509	0.01302
			510	0.0128
			511	0.01284
			512	0.0126
			513	0.01245
			514	0.01295
			515	0.01212
			516	0.01149
			517	0.01122
			518	0.01188
			519	0.01129
			520	0.01073
			521	0.01144
			522	0.01144
			523	0.01203
			524	0.01131
			525	0.01053
			526	0.01115
			527	0.01017
			528	0.01065
			529	0.01164
			530	0.01082
			531	0.00988
			532	0.01047
			533	0.00999
			534	0.00982
			535	0.01003
			536	0.01011
			537	0.01061
			538	0.01073
			539	0.00958
			540	0.00979
			541	0.0089
			542	0.00944
			543	0.01047
			544	0.00891
			545	0.00851
			546	0.00895
			547	0.00854
			548	0.0089
			549	0.00834
			550	0.00812
			551	0.00898
			552	0.00821
			553	0.00806
			554	0.00953
			555	0.00807
			556	0.00828
			557	0.00892
			558	0.00728
			559	0.00824
			560	0.00841
			561	0.0075
			562	0.00717
			563	0.00772
			564	0.00783
			565	0.00719
			566	0.00796
			567	0.0073
			568	0.00654
			569	0.00771
			570	0.00667
			571	0.00707
			572	0.00843
			573	0.00653
			574	0.00635
			575	0.00742
			576	0.00607
			577	0.00689
			578	0.00652
			579	0.00544
			580	0.00616
			581	0.00579
			582	0.00553
			583	0.00654
			584	0.00618
			585	0.00507
			586	0.00543
			587	0.00535
			588	0.0056
			589	0.00481
			590	0.00493
			591	0.00561
			592	0.005
			593	0.00486
			594	0.00611
			595	0.00413
			596	0.0041
			597	0.0053
			598	0.00465
			599	0.00394
			600	0.00578
