# Supplementary material for: Facile hydrothermal synthesis of N-doped fluorescent carbon dots for selective detection of insecticide parathion
Source: Royal Society of Chemistry journal article supplement (doi:10.1039/d3ay00124e), 2023-01-01
Supplement: d3ay00124e2.pdf [file d3ay00124e2.pdf]

### Electronic Supplementary Material

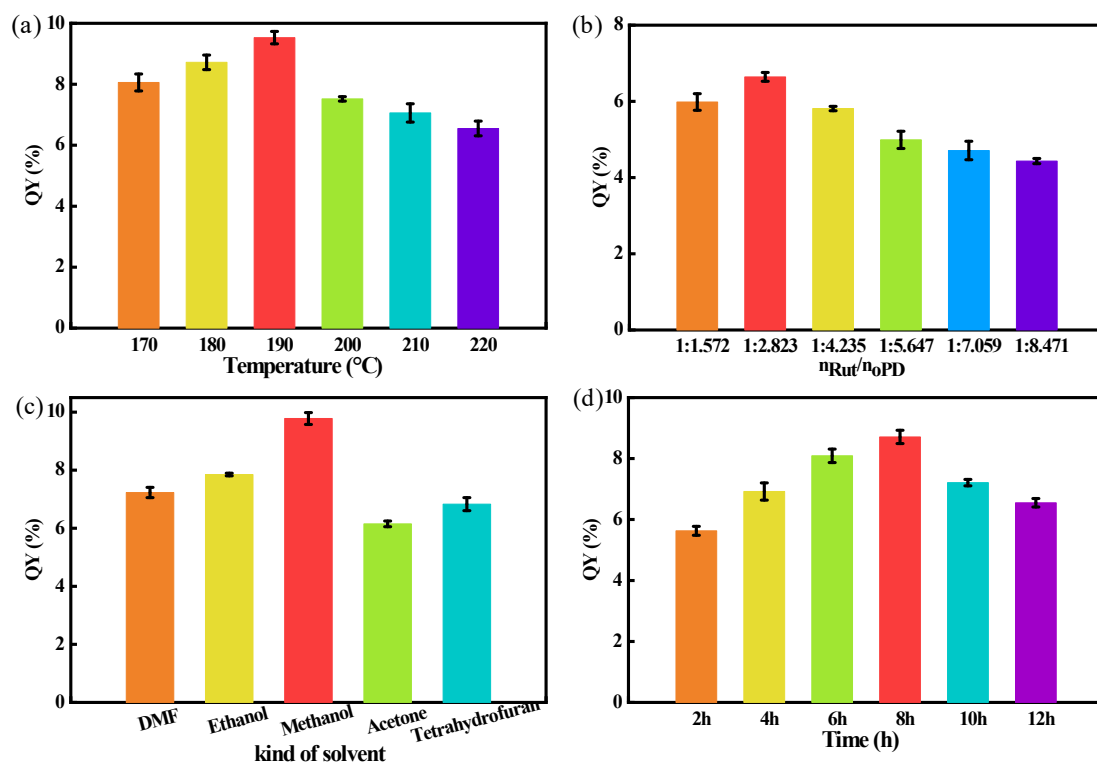

**Fig. S1** Optimization of preparation conditions. The QY of Rut-CDs varies in different reaction temperatures(a), proportions of rutimun and oPD (b), reaction solvents (c) and reaction times(d).

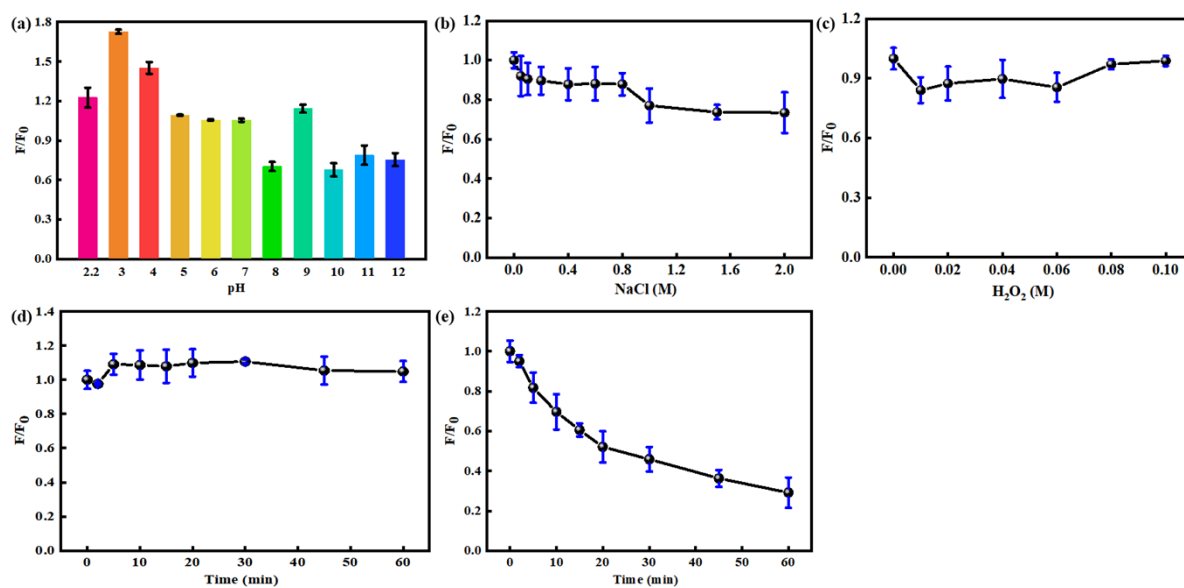

**Fig. S2** Fluorescence intensity of Rut-CDs at different pH values from 2.2 to 12 (a), 0-2 M NaCl concentration (b), antioxidant performance (c), and reaction time under natural (d) and UV light (e).

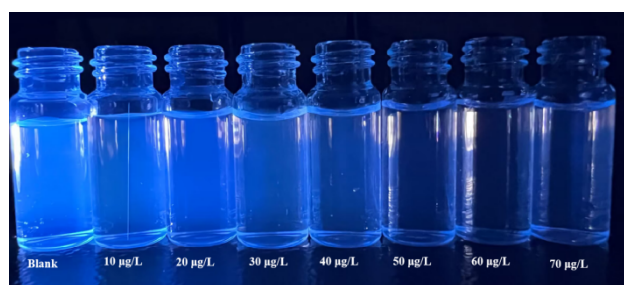

**Fig. S3** Fluorescence intensity change of Rut-CDs without or with different concentrations of parathion

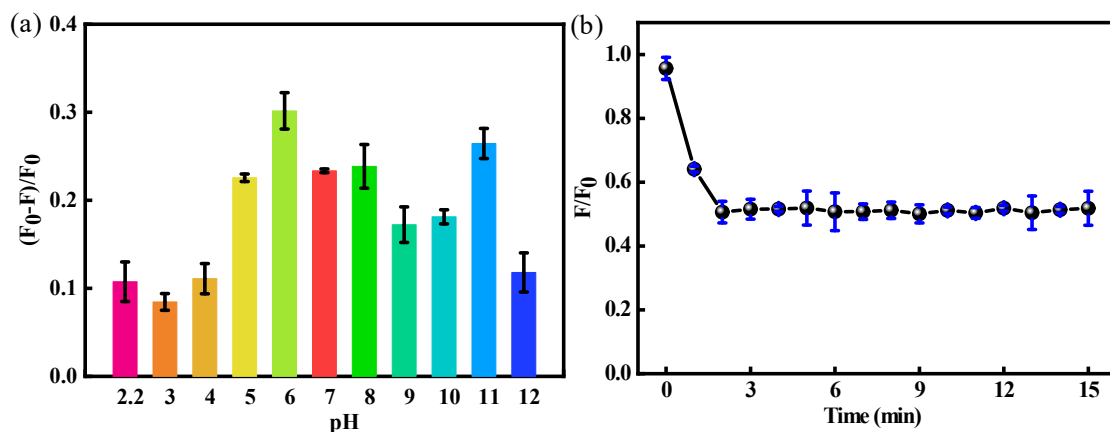

**Fig. S4** Fluorescence intensity of Rut-CDs detecting parathion at different pH values from 2.2 to 12 (a), and reaction time (b).

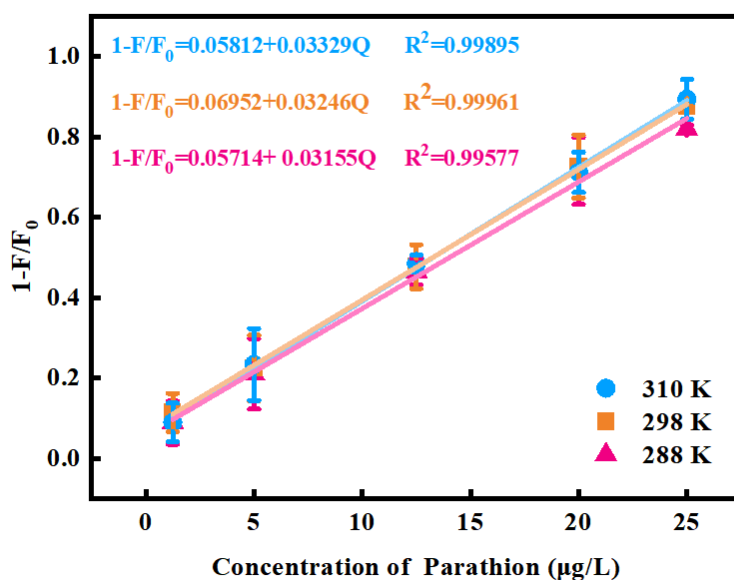

**Fig. S5** Stern-Volmer equation of Rut-CDs at different temperatures.  $F_0$  is the PL intensity of the purified Rut-CDs, and  $F$  is the PL intensity of Rut-CDs after addition of parathion.
