# Supplementary material for: Facile hydrothermal synthesis of N-doped fluorescent carbon dots for selective detection of insecticide parathion
Source: Royal Society of Chemistry journal article supplement (doi:10.1039/d3ay00124e), 2023-01-01
Supplement: d3ay00124e3.xlsx [file d3ay00124e3.xlsx]

## Sheet: Ex  Em 瀑布图
	EX=280 nm	290 nm	300 nm	310 nm	320 nm	330 nm	340 nm	350 nm	360 nm	370 nm	380 nm	390 nm	400 nm
EM=380	16188.7	18377.4	20615.2	17725.5	11242.6	5147.09	3424.66	1389.78	927.384	597.183
381	15818.5	18114.9	19930.4	17741.9	11275.9	5185.66	3777.88	1482.06	939.299	648.195
382	15437.1	17888.2	19492.8	17758.7	11344.1	5272.75	4224.17	1591.51	1005.12	742.085
383	15075	17670.6	19330.4	17819.9	11450.7	5431.55	4749.49	1734.2	1136.45	889.548
384	14794.1	17437.2	19343.9	17943.4	11599.3	5662.61	5291.59	1921.93	1311.62	1071.22
385	14612.1	17225.4	19437.4	18096.8	11807.8	5969.23	5821.08	2162.74	1515.32	1271.53
386	14463.9	17082.5	19523.7	18268	12082	6372.66	6320.53	2467.52	1758.83	1506.76
387	14286.7	17011.2	19576.4	18467.5	12423.8	6891.72	6762.95	2857.35	2068.46	1821.29
388	14107.8	16984.5	19662.4	18684.2	12852	7516.85	7154.5	3360.67	2466.37	2260.41
389	13993.2	16971	19839.7	18915.2	13378.2	8238.52	7567.05	4002.52	2964.07	2840.41
390	13951.9	16955.3	20102.2	19211.6	13990.6	9104.65	8108.27	4809.25	3568.77	3544.81	2554.55
391	13957.6	16957.3	20424	19640.3	14699.8	10198.3	8878.07	5823.29	4293.07	4359.79	2903.95
392	14021.9	17016	20760.9	20214.9	15566.8	11542.3	9970.42	7091.81	5155.26	5306.31	3411.27
393	14182.6	17149.4	21068.8	20907.6	16642.5	13089.1	11477.9	8639.6	6177.04	6426.15	4104.65
394	14439.9	17332.6	21385.5	21706.2	17921.8	14826.3	13437.9	10465.8	7393.52	7751.26	4948.71
395	14748.6	17533.5	21802.7	22603.7	19383.5	16835.2	15786.9	12554.7	8846.32	9296.56	5962.18
396	15069.6	17775.6	22347.6	23584.9	21030.7	19215.8	18415.8	14879.4	10544.9	11067.1	7200.06
397	15407.9	18124.8	22991.6	24674.4	22881.5	21989.3	21283.2	17413.5	12459.6	13063.1	8663.81
398	15797.3	18604.6	23737	25921.1	24949.3	25100.5	24464.7	20143.8	14571.3	15278.7	10280.2
399	16267.7	19174.8	24607.2	27315.6	27235.6	28492.7	28080.9	23043.3	16901.6	17692.1	11969.3
400	16825.2	19784.7	25605.6	28806.7	29732.1	32148.9	32176.6	26053.5	19476.1	20270.5	13726	12243.6
401	17434.1	20415.5	26724.7	30393.1	32422.7	36085.5	36688.5	29152.2	22289	23004.8	15627.2	12974
402	18042.5	21089.9	27937.6	32121.8	35281.5	40336.3	41509.5	32411.7	25308.7	25920.8	17746.9	14060.6
403	18666.4	21841.8	29179.6	33998.7	38291.6	44903	46544.2	35916.7	28483.6	29018.7	20068	15571.7
404	19384.6	22676.1	30390.8	35959.4	41468.1	49708	51731.8	39648.2	31775.5	32209	22499.6	17342.7
405	20205.9	23560.9	31566.9	37949.8	44808	54633.4	57054.8	43525.5	35224.1	35366.8	24967.4	19218.1
406	21024.8	24431.1	32752.5	39982.7	48226.6	59612.1	62517	47542	38901.8	38457.7	27464.3	21153.9
407	21747.5	25219.2	34010.5	42091.4	51649	64711.1	68185.3	51813.3	42809.9	41538.2	30050.1	23170
408	22396.7	25940.4	35396.4	44291.3	55172.6	70140.6	74247.5	56496.6	46913.4	44628.6	32818.1	25310.1
409	23061.2	26712.4	36905.5	46576.6	58959.4	76011	80779.1	61601.9	51169.2	47676.2	35784.2	27589.4
410	23771.4	27641	38425.7	48876.9	62913.7	82022.8	87395	66828.8	55411.2	50647.2	38792.9	29902.1	11884.1
411	24471.1	28708.3	39814.1	51078	66675	87631.2	93484	71733.3	59380	53557.1	41612	32058.2	12208
412	25123.4	29774.4	41075.9	53126.8	69997.1	92574.4	98883.2	76135.7	62933.1	56417.8	44137.4	33968.8	12654.2
413	25775.6	30676	42367.9	55026.5	72942.7	97047.7	103979	80209.8	66116.7	59243.4	46453	35715.8	13239.6
414	26479.7	31351.4	43738.5	56783.3	75695	101363	109094	84167.8	69086.7	62067.2	48691.5	37420.2	13876.2
415	27213.8	31885.1	45018.4	58454.4	78367.5	105612	114122	88050.1	71997.4	64904.2	50896.2	39130.3	14486.5
416	27915.4	32437.9	46058.5	60125	81018.2	109718	118839	91820.3	74879.4	67745.4	53044.4	40836.5	15087
417	28547.9	33135.2	46919.2	61789.9	83697.1	113678	123240	95500.5	77671.8	70586.5	55131.3	42505.9	15726.3
418	29122.4	33968.7	47771.6	63393	86413.6	117558	127486	99152.8	80392.1	73422.3	57160.7	44089.3	16386.4
419	29678.8	34796.8	48716.9	64945.5	89127.7	121351	131726	102776	83144.8	76239.7	59115.1	45552.2	17002.3
420	30265.6	35513.1	49709.9	66470.1	91789.5	125050	136014	106284	85979.6	79022.3	60998.9	46906.1	17552.4
421	30930.6	36173.3	50630.5	67910.2	94334.8	128736	140270	109605	88852.7	81750.9	62854.7	48198.3	18081
422	31669.1	36870.6	51443.7	69197.7	96710.4	132412	144339	112769	91692.7	84390.3	64690.5	49502.5	18634.6
423	32369.2	37583.1	52246.8	70365.5	98968.9	135923	148186	115857	94450.7	86875.6	66445.7	50893.2	19207.8
424	32908.4	38230.3	53143	71527	101224	139213	151967	118884	97100.5	89154.4	68081.4	52366.5	19757.5
425	33325.1	38777.4	54129.9	72751.7	103470	142444	155810	121840	99616.2	91251.9	69672.2	53815.3	20258.7
426	33773.6	39226.9	55113.1	74018.1	105589	145753	159623	124773	101980	93245.5	71332.6	55134.5	20736.4
427	34280.4	39594.9	55996.4	75303.2	107526	149066	163241	127711	104219	95181.5	73059	56321.8	21233.3
428	34695.2	39913	56752.7	76625.3	109335	152182	166645	130560	106390	97056.3	74748	57435.1	21755.5
429	34936.1	40205.1	57387.8	77955.3	111077	154937	169865	133201	108525	98857.4	76356	58482.5	22273.9
430	35131.9	40487.1	57876.5	79160.7	112781	157336	172798	135603	110617	100579	77910.4	59420	22763.1
431	35444.5	40796.9	58229.8	80086.7	114420	159551	175370	137766	112595	102186	79373.6	60251.5	23201.1
432	35861.8	41164.1	58575.6	80698.2	115873	161702	177719	139662	114343	103620	80650.7	61042.2	23556.9
433	36250.7	41556.5	59046.2	81146.1	117066	163726	179977	141311	115823	104864	81736.1	61823.2	23830.1
434	36552.2	41916.4	59602.3	81637.6	118109	165519	182059	142838	117164	105989	82706.2	62566.5	24077
435	36828.3	42220	60085.3	82217.7	119096	167049	183856	144334	118505	107069	83586.3	63234.2	24351.4
436	37133.1	42452.4	60415.5	82749.4	119893	168277	185419	145751	119800	108067	84323.2	63801.5	24647.4
437	37417.8	42582.5	60611.2	83095.8	120379	169160	186807	147022	120877	108871	84865.3	64265.3	24925.9
438	37587.9	42616.3	60681.9	83251.8	120671	169743	187926	148143	121643	109452	85228.6	64634.1	25159.8
439	37615.6	42603.9	60646.8	83312.3	120921	170124	188626	149107	122149	109887	85472.4	64887.1	25338.2
440	37558.7	42553.3	60579.9	83340.2	121113	170385	188925	149888	122492	110215	85604.2	64989.1	25465.4
441	37477	42436.9	60520.6	83298.5	121130	170585	189091	150479	122718	110387	85575.2	64964.7	25557.5
442	37378.9	42303.1	60414.2	83143.2	120917	170735	189382	150834	122855	110382	85399.7	64912.9	25600.9
443	37265.7	42239.5	60204.9	82890.1	120539	170780	189669	150854	122941	110245	85180.7	64931.1	25552.5
444	37159.4	42221.3	59915.6	82541.6	120101	170589	189541	150537	122977	110031	84991.2	65018.7	25420.8
445	37052.6	42141.5	59596.9	82079.1	119659	170052	188826	150037	122888	109781	84804.3	65062.8	25287.7
446	36914.9	41958.4	59268.9	81544.4	119214	169246	187804	149536	122609	109515	84563.5	64971.6	25211.1
447	36768.6	41699.3	58949.6	80994.8	118731	168407	186839	149101	122167	109202	84267.1	64790.7	25169.5
448	36648.3	41385.9	58650.5	80417.2	118150	167673	186018	148684	121643	108799	83927.5	64593.6	25116.6
449	36500.9	41041.5	58305.4	79785.9	117402	166955	185184	148163	121097	108327	83486.2	64343.5	25031.6
450	36253.9	40707.9	57832.2	79119	116470	166068	184158	147400	120532	107827	82878.9	63973.2	24908.5
451	35934.9	40404.4	57286	78437.9	115458	164928	182866	146334	119921	107252	82158.8	63481.8	24752.2
452	35626.4	40106.4	56779.5	77754.9	114503	163598	181348	145081	119242	106519	81449.3	62904.6	24596.1
453	35348	39786.3	56277.4	77088.2	113593	162145	179698	143823	118483	105657	80799.6	62288.2	24485.2
454	35053.7	39441.1	55657.8	76448.4	112578	160565	178010	142626	117596	104776	80167.4	61680.1	24422.2
455	34726.8	39064.4	54903.3	75817.9	111371	158909	176338	141433	116517	103879	79529.7	61078.7	24358.9
456	34411.2	38633.3	54083.5	75142.1	110027	157277	174664	140202	115288	102869	78927	60425.1	24252.3
457	34122.5	38165.6	53262	74357	108652	155662	172925	138929	114068	101743	78357.3	59678	24116.6
458	33813.4	37746.8	52510	73442.2	107305	153955	171084	137591	112910	100613	77703.7	58878.5	23998.7
459	33463.5	37425	51887.9	72451.1	106024	152107	169154	136170	111695	99528.6	76847.2	58107.6	23906.4
460	33095.7	37134.2	51369.2	71477.8	104844	150169	167161	134657	110366	98432.5	75805.8	57403	23786.6
461	32697.4	36800.4	50836.6	70552.9	103724	148191	165107	133021	109016	97261.1	74702.6	56755.2	23593
462	32238.7	36431.5	50164.3	69597.3	102544	146218	162973	131286	107691	96019.1	73628.7	56134.2	23358.7
463	31747.9	36028.3	49319.8	68526.4	101212	144287	160723	129537	106304	94745.7	72592	55485.9	23164.1
464	31282.9	35522.1	48394.4	67348.9	99732.5	142317	158338	127778	104812	93432.2	71565.8	54754.7	23023.8
465	30862.9	34866.8	47524.1	66138.1	98163.9	140174	155892	125915	103293	92035.3	70516.9	53942.8	22852.3
466	30462.7	34113.6	46792.8	64957.3	96537.3	137900	153516	123904	101855	90583.5	69431.7	53107.3	22570.8
467	30045.3	33376.8	46182.9	63835.4	94820	135654	151232	121842	100494	89159.3	68364.2	52293.8	22189.3
468	29596	32777.8	45582.7	62771.6	93023.8	133457	148917	119912	99081.2	87796	67384.2	51505	21757.1
469	29139.3	32373.7	44895	61718.4	91299.4	131230	146486	118198	97510.5	86481.6	66455.8	50720.4	21303
470	28704.5	32074.5	44163.8	60616.8	89791.6	128983	143987	116572	95826.3	85187.2	65453.8	49913.9	20846.2
471	28279.5	31678.3	43510.4	59488.4	88463.5	126751	141515	114846	94188.3	83851.7	64321.6	49083.4	20404.7
472	27825.9	31057.6	42918.3	58399.4	87162.8	124498	139105	112969	92704.9	82416.5	63142.8	48274.2	19980.6
473	27341.1	30294.3	42208.6	57341.1	85757.7	122204	136743	110996	91338.8	80878.7	62030.9	47517.4	19572.6
474	26870.8	29600.6	41274.9	56233.1	84173.9	119914	134403	108986	89979.2	79289.6	60996.5	46750.2	19187.1
475	26436.9	29100.8	40223	55023.4	82417	117636	132027	106969	88522.6	77719.5	59951	45865.7	18815.8
476	25995.1	28714.5	39238.9	53753.5	80580.2	115336	129496	104918	86875.5	76212.2	58821.5	44846.6	18431.6
477	25492.2	28275.5	38412.6	52542.3	78757	113008	126730	102796	85020.9	74769	57629.9	43801.5	18029.9
478	24951	27726.5	37703.4	51483.7	76974	110679	123842	100618	83094.7	73377.2	56438.5	42856.2	17649.2
479	24457.8	27146.7	37015.9	50559.5	75251.2	108375	121078	98444.9	81269	72029	55257.2	42028.1	17329.7
480	24048.4	26619.8	36288.8	49674.7	73638.6	106128	118545	96366.2	79581.8	70718.9	54064.4	41233.8	17067.2
481	23660	26137.5	35513.5	48753.4	72138.9	103985	116121	94468.2	77967.7	69426.3	52891	40418.5	16823.8
482	23228.5	25642.3	34692.1	47782	70663.9	101971	113675	92718.7	76387	68105.8	51816.5	39603.6	16563.5
483	22769.4	25116	33846.7	46769	69114	100025	111225	90953.8	74847.7	66735.5	50863.3	38793.5	16265.2
484	22329.4	24590.1	33044.7	45683.8	67484.9	98004	108831	89055.9	73348.2	65356.3	49932.2	37954.8	15928.9
485	21907.8	24079.7	32331.3	44490.6	65871.1	95803.1	106511	87077.4	71843.9	64004.4	48897	37103.7	15582.3
486	21457	23560.1	31672.3	43250.4	64349.5	93464.7	104274	85129.9	70270.7	62652.7	47754	36280.4	15264.6
487	20957.6	23015.5	31002.7	42105.1	62906.3	91139.6	102116	83219.7	68617.9	61267.4	46611	35464.7	14989.9
488	20466.5	22464	30288.8	41133.6	61508.2	88957	99937.6	81290	66971.9	59869.8	45556.8	34633.4	14732.3
489	20055.4	21919.3	29531.2	40282.6	60153.9	86934.6	97609.2	79363.4	65450.1	58507.6	44597.7	33830.8	14447.4
490	19728.3	21374.9	28734.1	39456.2	58822	84986.9	95164.2	77515.1	64090.5	57201.3	43676.8	33097.9	14122.4
491	19431.8	20841.5	27919.6	38608.7	57472	83013.9	92803	75749.8	62815.7	55930	42725.6	32419.2	13800.9
492	19099.1	20355.7	27176.6	37729.4	56105.5	80992.1	90655.4	74003.4	61500	54655.8	41728.1	31770	13533.7
493	18676.3	19935.1	26587.2	36813.3	54745.1	78975.4	88642.5	72220.9	60089.9	53352.5	40726.5	31130.5	13308
494	18176.7	19562.8	26081.8	35880.8	53366.6	77006.7	86614.4	70380.3	58648.7	52019.2	39762.2	30451.1	13059.1
495	17701.7	19221.2	25497.3	34963	51926.5	75061.9	84526	68504.1	57245.2	50687.5	38842.1	29680	12750.8
496	17332	18901.1	24780.2	34060.8	50463.9	73088.3	82412	66686.5	55848	49402.3	37943.2	28845.3	12413.2
497	17023.5	18571.2	24018.2	33162	49095.7	71072.2	80272	65045.6	54404	48181.2	37027.1	28052.7	12096.3
498	16685.5	18174.2	23286.7	32274.4	47864.4	69062.8	78087.4	63609.9	52959.6	47008.2	36064.4	27375	11816.2
499	16312.4	17670.4	22576.9	31411.7	46683.3	67152	75902.5	62294.4	51594.6	45864.1	35055.3	26774.4	11556.9
500	15960.5	17093.4	21887.5	30564.5	45485.5	65405.3	73803.4	60976.9	50300.6	44742.8	34033.5	26157	11300.8
501	15643.7	16541.4	21276.7	29710.3	44298.6	63780.4	71834.9	59555.5	49030.9	43639.1	33048.6	25469.2	11044.7
502	15318	16073.6	20766.6	28868.2	43146.6	62173.5	69963.3	57982.1	47793.1	42523.8	32132.9	24729	10790.1
503	14939.5	15646.5	20290.3	28101.1	42008.6	60553.1	68108.8	56304.4	46613.5	41361.7	31287.6	23995	10531.4
504	14507.3	15199.8	19799.5	27409.2	40868.1	58952.4	66224.1	54649.7	45466.4	40178	30495.2	23313.8	10266.3
505	14069.6	14744.2	19334.9	26694.2	39720.3	57373.8	64336.2	53106.7	44280.3	39059.5	29738	22682.2	10007.2
506	13679.6	14329.6	18929.9	25892.3	38562.4	55800	62501.8	51657.1	43020.9	38039.8	28998.4	22063.1	9762.22
507	13326.7	13984.1	18524.4	25043.7	37411.8	54210.9	60736.8	50260.7	41761.9	37048.4	28241.7	21432.5	9520.25
508	12962.2	13696.4	18033.1	24204.6	36299.1	52574.1	59007.2	48921.9	40619.5	36015.5	27434.9	20804.1	9269.61
509	12590.4	13428.8	17457.3	23420.9	35231.9	50927.2	57291.6	47622.3	39613.5	34960.7	26597.1	20218.1	9015.32
510	12252.9	13143.6	16878.6	22753.2	34190	49398.9	55609.9	46292	38672.4	33950	25787.6	19699.9	8769.4
511	11956.9	12816.1	16355.9	22197	33161.9	48045.8	53980.2	44902.4	37735.3	33008.9	25043.2	19219.1	8539.71
512	11687.6	12440.1	15860.3	21648	32158.7	46763.5	52393.6	43511.3	36749.5	32092.7	24360.1	18718.1	8329.05
513	11438	12048.7	15328.6	21029.1	31185.4	45417.2	50834.5	42203.5	35670	31144.5	23716.1	18188.1	8131.44
514	11193.6	11703.1	14769.7	20363.3	30245	43989	49305.2	41024.8	34570.8	30172.3	23078.1	17663.1	7932.88
515	10925	11417.5	14269.1	19708.9	29367.2	42561.3	47835.4	39940.2	33595.3	29238.6	22419.1	17143.1	7725.29
516	10606.5	11128.7	13878.2	19101.4	28561.9	41200.1	46447.9	38853.6	32731.5	28389.1	21747.7	16598.8	7514.71
517	10247.6	10782	13559.4	18545.1	27767.3	39907.4	45117.8	37718	31833.6	27621.3	21099.4	16044.5	7312.22
518	9899.73	10403.4	13247	18019.8	26911.2	38685.7	43821.7	36598.4	30870	26894.2	20490.8	15528.3	7121.47
519	9611.96	10043	12906.2	17507.6	25995.8	37565.1	42585.8	35572.5	29942.9	26151.3	19904.5	15069.4	6935.98
520	9393.33	9716.41	12540.6	17004.5	25095.3	36524	41414.9	34623.6	29089.6	25379.3	19328.5	14659.5	6748.71
521	9225.21	9437.05	12183.1	16496.4	24300.3	35471.5	40246.8	33681	28248.6	24639.8	18780.9	14287.6	6567.07
522	9086.55	9224.07	11858.7	15962.5	23651.7	34370.3	39037.3	32707	27392.6	23983.8	18269	13928.6	6407.81
523	8958.38	9048.72	11546.3	15414.7	23094	33306.9	37805.8	31709.3	26567.3	23367.4	17762.3	13551.1	6270.18
524	8806.93	8852.86	11213.6	14900	22515.1	32384.2	36577.6	30727.8	25810.1	22717.7	17238	13157.3	6135.56
525	8585.63	8628.31	10867.9	14458.5	21859.6	31577.8	35370.2	29822.2	25106.4	22032.8	16711.7	12777.4	5998.77
526	8283.56	8406.66	10536	14091.6	21181.5	30755	34233.3	29019.1	24430.9	21360	16207.2	12419	5867.68
527	7954	8187.89	10220.8	13772.2	20555.6	29837.5	33217.2	28256.5	23779.8	20725.3	15733	12063.4	5730.81
528	7667.25	7950.69	9906.77	13465.5	19974.7	28889.5	32308.6	27436.1	23136.9	20120.5	15285.8	11708.1	5562.88
529	7451.56	7705.7	9594.54	13131.9	19388.9	28012.4	31439.5	26548.9	22459.4	19524	14846.7	11368.2	5367.36
530	7297.28	7478.28	9308.95	12740.9	18802	27203.8	30539.1	25680.7	21731.1	18932.4	14395.5	11045.2	5182.12
531	7188.11	7267.47	9056.22	12313	18243.8	26376	29580.6	24877	20993.2	18374	13946.4	10730.8	5035.47
532	7095.66	7054.52	8798.9	11910.1	17704.1	25488.6	28607.9	24112.9	20301.3	17863.1	13540.7	10424.9	4920.06
533	6971.49	6828.81	8509.97	11564.3	17165.5	24606.3	27704.3	23389.1	19667.3	17365	13191.6	10126.2	4812.16
534	6785.53	6608.82	8219.88	11248.4	16641.1	23826.6	26917.7	22725.5	19061.7	16837.3	12864.8	9821.59	4694.75
535	6557.82	6440.32	7962.08	10921.3	16132.4	23172.3	26222	22088.4	18480.2	16282.3	12520.9	9503.98	4562.17
536	6330.5	6329.94	7715.15	10568.1	15604.5	22557.3	25545.7	21432.5	17968.6	15738	12158	9193.03	4420.6
537	6126.45	6203.36	7451.42	10202.1	15046.9	21870.9	24825.6	20769.3	17537.1	15232.7	11804.8	8908.54	4283.37
538	5948.48	5996.35	7191.83	9842.73	14518.5	21098.9	24032.1	20139.4	17104.8	14770.9	11475.7	8638.75	4155.35
539	5802.76	5743.52	6969.61	9502.35	14078.7	20332	23182.8	19559.5	16595.3	14356.7	11154.1	8369.69	4031.99
540	5698.47	5520.77	6790.27	9192.12	13707.4	19671.7	22365.5	19025.4	16038.3	13998.3	10824.9	8115.28	3920.83
541	5617	5358.42	6637.42	8922.23	13347.4	19152.8	21690.4	18534.5	15514.3	13675.1	10495.4	7886.71	3835.04
542	5510.91	5237.19	6470.98	8687.34	12974.8	18713.2	21155.9	18074.6	15048.1	13332.1	10178.9	7674.25	3754
543	5351.09	5116.24	6246.51	8469.07	12600.2	18238.6	20622.7	17606.6	14617.1	12937.9	9887.28	7474.42	3636.78
544	5146.78	4970.58	5970	8248.45	12255.3	17679	19994.9	17096	14214.3	12529.9	9625.66	7296.55	3488.8
545	4928.38	4823.86	5696.59	8008.29	11964.6	17086.4	19351.3	16552.2	13836.5	12174.8	9376.04	7144.34	3360.2
546	4747.49	4709.5	5472.81	7751.25	11678.4	16520.3	18805.2	16011.2	13462.1	11891.1	9109.36	7009.49	3272.49
547	4654.05	4607.59	5311.35	7510.75	11301.1	15991.4	18323.6	15506.7	13090.9	11625.6	8817.99	6870.49	3201.37
548	4635.73	4473.54	5203.46	7308.38	10826.1	15504.2	17800.6	15064.4	12748.1	11307.1	8525.17	6698.12	3128.63
549	4619.73	4307.47	5129.51	7120.1	10358.9	15064.7	17228.1	14670.5	12428.4	10915	8268.13	6481.4	3059.35
550	4546.74	4143.81	5063.93	6914.9	9987.99	14649.7	16675.7	14265	12093.3	10496.9	8061.57	6246.91	2989.85
551	4417.9	3996.88	4981.13	6699.74	9715.15	14234.8	16174.7	13825.5	11730.6	10123.9	7876.95	6033.26	2904.1
552	4272.66	3860.08	4865.11	6497.41	9499.54	13836.6	15721	13403.8	11364.8	9831.71	7679.35	5849.18	2807.89
553	4135.44	3738.03	4718.39	6305.38	9291.57	13471.4	15316.7	13042.6	11019.4	9609.14	7464.45	5677.6	2731.2
554	4001.86	3643.9	4555.86	6107.57	9050.19	13106.9	14936.7	12728.4	10694.8	9419.18	7236.52	5509.8	2688.38
555	3877.15	3577.15	4394.49	5902.82	8776.41	12708.1	14523.7	12424.9	10373.8	9209.13	6990.37	5350.32	2657.93
556	3784.15	3526.92	4257.43	5698.17	8506.37	12284.3	14066.3	12087.2	10044.8	8940.07	6739.92	5198.43	2607.92
557	3722.06	3485.09	4161.05	5498.92	8257.11	11857	13615.8	11683.6	9726.84	8635.34	6516.81	5041.1	2533.88
558	3660.9	3439.21	4087.41	5315.86	8009.34	11445.8	13198.5	11253	9459.14	8354.3	6321.23	4868.05	2461.39
559	3582.49	3365.96	4006.88	5163.12	7747.53	11090.6	12778.6	10872.5	9256.32	8111.6	6123.72	4692.01	2406.19
560	3495.34	3253.42	3917.92	5036.63	7481.6	10820.3	12334.9	10555.4	9081.28	7871.8	5919.98	4539.71	2353.07
561	3412.99	3125	3829.93	4905.45	7222.94	10600.8	11908.1	10267.7	8878.52	7617.8	5736.04	4421.13	2287.56
562	3339.43	3022.39	3740.13	4750.67	6970.59	10357.4	11529.8	10018.9	8632.33	7383.11	5585.17	4322.58	2215.85
563	3272	2962.97	3644.77	4599.41	6728.25	10054.6	11170.4	9838.01	8372.63	7206.19	5452.86	4225.49	2142.64
564	3206.59	2922.69	3542.72	4481.7	6514.65	9724.2	10804	9688.83	8125.84	7074.51	5316.86	4120.39	2066.54
565	3137.65	2864.2	3440.95	4375.67	6340.12	9410.86	10458.5	9484.76	7878.29	6943.23	5167.95	4009.91	1999.31
566	3053.75	2783.21	3362.68	4240.69	6176.52	9133.63	10162.1	9180.57	7601.45	6792.11	5015.76	3905.79	1952.8
567	2944.6	2714.04	3313.39	4087.22	5985.97	8909.12	9900.27	8819.25	7310.63	6626.38	4875.67	3816.36	1916.32
568	2825.59	2676.72	3257.06	3965.6	5780.85	8748.8	9649.49	8486.58	7066.51	6445.34	4755.1	3730.95	1875.45
569	2737.99	2637.77	3161.29	3889.69	5606.41	8613.7	9405.04	8222.3	6902.5	6250.49	4658.85	3628.52	1832.6
570	2700.51	2547.88	3035.45	3822.54	5473.84	8418.93	9168.76	7992.73	6784.69	6066.74	4588.81	3509.07	1792.99
571	2676.44	2410.23	2906.8	3735.93	5360.63	8117.03	8940.44	7762.84	6659.63	5917.34	4524.47	3398.56	1755.24
572	2616.03	2285.16	2788.8	3634.65	5254.94	7766.61	8721.22	7549.6	6507.37	5780.54	4429.29	3311.45	1721.1
573	2518.63	2220.2	2680.6	3525.99	5154.94	7477.41	8500.21	7370.85	6330.81	5606.72	4288.97	3228.18	1692.36
574	2427.38	2200.68	2581.42	3406.19	5041.77	7280.2	8249.64	7204.03	6131.9	5386.25	4123.81	3128	1659.58
575	2378.35	2182.63	2495.59	3279.56	4892.1	7101.95	7964.01	7025.46	5923.39	5165.32	3964.71	3022.32	1609.84
576	2378.8	2148.46	2424.74	3167.04	4717.98	6876.62	7690.72	6830.59	5734.96	4985.63	3833.28	2932.54	1547.58
577	2415.19	2110.99	2367.21	3086.47	4563.15	6628.49	7487.87	6617.81	5592.84	4843.14	3735.23	2859.82	1498.26
578	2456.95	2081.49	2324.67	3033.36	4450.3	6426.91	7348.85	6400.35	5505.44	4713.02	3654.98	2796.64	1482.63
579	2462.89	2051.71	2293.52	2985.78	4358.97	6285.02	7201.04	6204.19	5452.31	4581.23	3565.32	2743.25	1491.51
580	2404.16	2004.06	2254.62	2923.34	4264.26	6144.3	6996.75	6030.38	5379.59	4444.68	3457.2	2697.4	1494.84
581	2290.14	1936.16	2189.75	2836.94	4167.33	5963.2	6762.17	5861.12	5244.3	4307.35	3348.03	2644.7	1469.37
582	2170.01	1868.44	2111.2	2723.56	4072.74	5764.38	6536.04	5698.74	5068.28	4183.38	3251.17	2572.97	1412.18
583	2094.63	1820.24	2059.71	2590.55	3965	5583.83	6322.89	5556.28	4910.98	4082.66	3160.07	2487.71	1338.31
584	2067.53	1788.44	2057.81	2473.8	3832.01	5431.39	6127.48	5426.96	4794.31	3987.37	3070.2	2405.06	1269.1
585	2044.05	1754.74	2074.99	2419.43	3694.2	5301.35	5966.98	5292.23	4683.17	3867.61	2992.19	2339.39	1216.28
586	1989.94	1704.28	2058.11	2420.98	3580.78	5178.46	5828.26	5144.68	4531.42	3729.95	2935.33	2293.94	1181.06
587	1919.99	1637.24	1986.74	2411.64	3485.46	5041.61	5672.36	4993.46	4334.65	3620.27	2889.43	2250.35	1163.97
588	1860.45	1568.67	1879.68	2346.96	3377.13	4881.19	5498.8	4851.06	4141.24	3563.95	2827.4	2184.23	1157.71
589	1806.95	1517.18	1763.81	2250.4	3247.42	4703.69	5349.24	4713.04	4005.57	3529.21	2730.41	2102.44	1141.23
590	1744.41	1491.01	1662.27	2164.07	3119.46	4522.45	5228.81	4569.91	3928.39	3466.66	2611.64	2038.13	1104.23
591	1679.94	1483.3	1595.11	2107.89	3018.16	4359.75	5082.91	4443.56	3857.82	3364.99	2505.81	2001.13	1063.04
592	1636.1	1482.41	1562	2084.71	2949.68	4246.54	4883.61	4366.62	3755.09	3247.86	2435.07	1962.52	1036.04
593	1617.29	1482.11	1535.63	2078.54	2896.03	4192.16	4682.66	4322.64	3638.3	3137.78	2394.39	1895.83	1022.83
594	1595.43	1472.89	1492.62	2056.96	2823.4	4156.64	4538.38	4257.79	3543.11	3044.66	2364.17	1808.99	1015.1
595	1547.25	1436.1	1443.26	1999.13	2717	4083.72	4440.57	4143.01	3460.98	2967.64	2323.67	1730.78	1007.92
596	1490.71	1367.42	1417.53	1914.88	2605.66	3963.92	4346.34	3990.06	3353.15	2896.71	2264.04	1682.84	996.527
597	1453.68	1294.18	1424.04	1834.47	2524.38	3830.41	4246.92	3830.26	3217.04	2824.65	2202.24	1665.81	974.261
598	1428.86	1248.97	1433.71	1783.38	2457.89	3686.42	4168.67	3699.72	3087.25	2746.85	2161.59	1660.29	936.443
599	1388.59	1237.05	1410.03	1765.3	2353.66	3486.67	4134.02	3623.08	2974.38	2651.06	2137.38	1641.23	884.224
600	1326.22	1242.29	1350.57	1766.32	2197.02	3218.87	4135.09	3590.87	2862.66	2533.8	2111.98	1602.28	823.975
