# Supplementary material for: Facile hydrothermal synthesis of N-doped fluorescent carbon dots for selective detection of insecticide parathion
Source: Royal Society of Chemistry journal article supplement (doi:10.1039/d3ay00124e), 2023-01-01
Supplement: d3ay00124e4.xlsx [file d3ay00124e4.xlsx]

## Sheet: Sheet1
Rut-oPD	Wavenumber	Rut-CDs	Wavenumber
397.266	8.49889	397.266	1.80943
401.123	8.60443	401.123	2.00451
404.98	8.41107	404.98	2.61131
408.837	8.06203	408.837	3.00066
412.694	7.58605	412.694	2.71321
416.551	6.96148	416.551	1.76176
420.408	5.98657	420.408	0.55497
424.265	5.09521	424.265	0.15356
428.122	4.44315	428.122	0.12999
431.979	4.03631	431.979	0.28057
435.836	3.94315	435.836	0.57954
439.693	4.00816	439.693	0.97132
443.55	3.94184	443.55	1.38607
447.407	3.65357	447.407	1.68287
451.264	3.27264	451.264	1.87065
455.121	2.87256	455.121	1.92156
458.978	2.68595	458.978	1.92661
462.835	2.43277	462.835	1.84302
466.692	1.90212	466.692	1.60953
470.549	1.37471	470.549	1.375
474.405	0.89632	474.405	1.22302
478.262	0.2071	478.262	1.07665
482.119	-0.64692	482.119	0.96384
485.976	-0.99509	485.976	0.80632
489.833	-0.68367	489.833	0.64264
493.69	-0.38944	493.69	0.39227
497.547	-0.2449	497.547	-0.13976
501.404	-0.10146	501.404	-1.09423
505.261	0.43031	505.261	-2.4141
509.118	0.72946	509.118	-5.91773
512.975	0.33202	512.975	-10.4716
516.832	-0.74152	516.832	-11.0607
520.689	-1.66496	520.689	-7.61817
524.546	-1.65219	524.546	-4.29331
528.403	-1.62703	528.403	-1.95231
532.26	-1.88459	532.26	-0.32314
536.117	-1.55262	536.117	1.00646
539.974	-0.94133	539.974	1.49272
543.831	-0.64773	543.831	1.16322
547.688	-0.40401	547.688	0.94411
551.545	-0.62797	551.545	0.88111
555.402	-1.67996	555.402	0.7637
559.258	-2.31259	559.258	0.59281
563.115	-1.79228	563.115	0.57266
566.972	-1.24324	566.972	0.6951
570.829	-1.23394	570.829	0.68346
574.686	-1.08741	574.686	0.60112
578.543	-0.7656	578.543	0.64834
582.4	-0.83268	582.4	0.8017
586.257	-2.06628	586.257	0.87679
590.114	-4.41174	590.114	0.92193
593.971	-6.78593	593.971	1.05324
597.828	-7.52593	597.828	1.16541
601.685	-6.79644	601.685	1.13124
605.542	-5.63402	605.542	0.99224
609.399	-4.50103	609.399	0.93126
613.256	-3.57559	613.256	0.77428
617.113	-3.13187	617.113	0.52372
620.97	-3.24204	620.97	0.15829
624.827	-3.98076	624.827	-0.16495
628.684	-4.8976	628.684	-0.45881
632.541	-5.04994	632.541	-0.85751
636.398	-4.71225	636.398	-1.30101
640.255	-4.75518	640.255	-1.69139
644.111	-4.68776	644.111	-1.931
647.968	-4.16774	647.968	-2.20209
651.825	-4.82464	651.825	-2.70378
655.682	-6.12223	655.682	-3.206
659.539	-5.14146	659.539	-3.63181
663.396	-3.20523	663.396	-4.102
667.253	-2.40819	667.253	-4.71596
671.11	-2.10192	671.11	-5.16229
674.967	-1.53395	674.967	-5.40627
678.824	-0.89612	678.824	-5.80444
682.681	-0.71546	682.681	-6.24039
686.538	-0.97278	686.538	-6.64094
690.395	-0.9487	690.395	-7.13454
694.252	-0.41868	694.252	-7.81181
698.109	0.24499	698.109	-8.66852
701.966	0.09821	701.966	-9.45889
705.823	-1.41223	705.823	-10.2109
709.68	-3.2859	709.68	-11.1573
713.537	-4.03625	713.537	-12.1577
717.394	-3.69762	717.394	-12.8488
721.251	-3.69888	721.251	-13.0756
725.108	-4.6749	725.108	-12.9008
728.965	-5.00075	728.965	-12.315
732.821	-4.01008	732.821	-11.2814
736.678	-3.38735	736.678	-9.85863
740.535	-3.62761	740.535	-8.12908
744.392	-3.80119	744.392	-6.10327
748.249	-3.68814	748.249	-3.917
752.106	-3.31453	752.106	-1.91322
755.963	-2.58653	755.963	-0.40056
759.82	-1.58222	759.82	0.54843
763.677	-0.51351	763.677	0.98495
767.534	0.32093	767.534	0.70955
771.391	1.81085	771.391	-0.18892
775.248	2.91872	775.248	-1.19478
779.105	3.43428	779.105	-1.92893
782.962	2.90008	782.962	-2.57461
786.819	1.10015	786.819	-3.35571
790.676	-0.9263	790.676	-4.18446
794.533	-2.53641	794.533	-4.77737
798.39	-4.43587	798.39	-5.00107
802.247	-7.43664	802.247	-4.88791
806.104	-10.579	806.104	-4.60418
809.961	-10.0726	809.961	-4.57601
813.818	-7.13274	813.818	-5.33762
817.674	-3.97594	817.674	-7.96192
821.531	-3.3188	821.531	-12.0594
825.388	-4.54127	825.388	-14.6952
829.245	-6.11371	829.245	-15.1393
833.102	-6.93232	833.102	-14.8708
836.959	-6.37755	836.959	-13.6109
840.816	-4.63073	840.816	-11.0343
844.673	-3.25034	844.673	-8.1381
848.53	-2.42828	848.53	-5.68152
852.387	-0.87094	852.387	-3.772
856.244	0.87332	856.244	-2.25562
860.101	1.43081	860.101	-1.0604
863.958	0.53669	863.958	-0.15579
867.815	-0.22338	867.815	0.27218
871.672	-2.21894	871.672	0.59593
875.529	-5.38702	875.529	0.85923
879.386	-7.43075	879.386	1.00629
883.243	-6.264	883.243	1.03835
887.1	-3.41709	887.1	1.04418
890.957	-1.1657	890.957	1.05913
894.814	0.03759	894.814	1.05045
898.671	0.51183	898.671	1.05373
902.527	0.30464	902.527	1.13431
906.384	-0.6462	906.384	1.21051
910.241	-1.61513	910.241	1.22718
914.098	-1.50856	914.098	1.23863
917.955	-0.38767	917.955	1.22538
921.812	0.56763	921.812	1.204
925.669	0.15366	925.669	1.10715
929.526	-1.58474	929.526	0.81424
933.383	-3.31068	933.383	0.64419
937.24	-4.34504	937.24	0.77426
941.097	-5.23031	941.097	0.7814
944.954	-4.21467	944.954	0.58022
948.811	-0.89668	948.811	0.54765
952.668	5.62543	952.668	0.66579
956.525	9.34545	956.525	0.64019
960.382	10.8589	960.382	0.49662
964.239	9.67009	964.239	0.38936
968.096	4.4993	968.096	0.30726
971.953	1.63334	971.953	0.30854
975.81	1.15633	975.81	0.24107
979.667	1.60746	979.667	0.21344
983.524	2.03879	983.524	0.23124
987.38	1.3093	987.38	0.20988
991.237	-1.12155	991.237	0.1688
995.094	-4.63079	995.094	0.13552
998.951	-7.44755	998.951	0.0695
1002.81	-8.15042	1002.81	-0.06475
1006.67	-9.167	1006.67	-0.24133
1010.52	-12.2834	1010.52	-0.36754
1014.38	-13.3996	1014.38	-0.3414
1018.24	-9.47846	1018.24	-0.20211
1022.09	-3.4636	1022.09	-0.11494
1025.95	0.7525	1025.95	-0.11263
1029.81	2.15767	1029.81	-0.10072
1033.66	2.14592	1033.66	-0.0593
1037.52	0.69809	1037.52	-0.02
1041.38	-0.24973	1041.38	0.0147
1045.23	-0.51259	1045.23	0.05245
1049.09	-0.16953	1049.09	0.03505
1052.95	-2.68646	1052.95	-0.10886
1056.81	-7.50898	1056.81	-0.35844
1060.66	-11.4346	1060.66	-0.73007
1064.52	-12.6589	1064.52	-1.03538
1068.38	-11.121	1068.38	-0.88065
1072.23	-7.46805	1072.23	-0.43924
1076.09	-3.27828	1076.09	-0.14991
1079.95	-2.32799	1079.95	-0.0104
1083.8	-3.58812	1083.8	0.07428
1087.66	-5.85466	1087.66	0.10667
1091.52	-7.54498	1091.52	0.15556
1095.38	-6.62238	1095.38	0.21643
1099.23	-2.48335	1099.23	0.17326
1103.09	1.75912	1103.09	0.02573
1106.95	2.39794	1106.95	-0.16329
1110.8	-0.21849	1110.8	-0.43453
1114.66	-3.28323	1114.66	-0.8544
1118.52	-4.87057	1118.52	-1.52573
1122.37	-5.66549	1122.37	-2.47774
1126.23	-5.43448	1126.23	-3.25293
1130.09	-5.17416	1130.09	-3.09176
1133.94	-4.68703	1133.94	-1.91425
1137.8	-3.6605	1137.8	-0.54983
1141.66	-3.01334	1141.66	0.28609
1145.52	-2.88849	1145.52	0.56959
1149.37	-2.59555	1149.37	0.64782
1153.23	-1.56486	1153.23	0.58403
1157.09	-0.28146	1157.09	0.46297
1160.94	-1.52672	1160.94	0.24698
1164.8	-5.19114	1164.8	-0.10118
1168.66	-8.09189	1168.66	-0.49564
1172.51	-6.82742	1172.51	-0.86844
1176.37	-2.58438	1176.37	-1.19509
1180.23	0.29209	1180.23	-1.36846
1184.09	0.3481	1184.09	-1.45122
1187.94	-2.01152	1187.94	-1.6072
1191.8	-6.74193	1191.8	-1.78423
1195.66	-13.6702	1195.66	-1.92917
1199.51	-20.7938	1199.51	-2.01628
1203.37	-24.3315	1203.37	-2.02463
1207.23	-22.085	1207.23	-2.01279
1211.08	-15.8721	1211.08	-2.0046
1214.94	-8.51736	1214.94	-2.03378
1218.8	-2.09413	1218.8	-2.11204
1222.65	1.41313	1222.65	-2.25636
1226.51	1.58255	1226.51	-2.50795
1230.37	-0.30614	1230.37	-2.86774
1234.23	-2.17665	1234.23	-3.30404
1238.08	-2.68868	1238.08	-3.76789
1241.94	-1.83767	1241.94	-4.36931
1245.8	-0.79495	1245.8	-5.20892
1249.65	-0.49625	1249.65	-6.55579
1253.51	-1.16872	1253.51	-8.74297
1257.37	-2.41977	1257.37	-11.3331
1261.22	-4.36575	1261.22	-13.2206
1265.08	-6.81553	1265.08	-12.5402
1268.94	-9.55054	1268.94	-8.37595
1272.8	-12.0413	1272.8	-3.29641
1276.65	-13.4248	1276.65	-0.3513
1280.51	-14.0343	1280.51	0.72216
1284.37	-15.7593	1284.37	0.98404
1288.22	-19.7817	1288.22	0.89776
1292.08	-24.8948	1292.08	0.6475
1295.94	-27.7552	1295.94	0.24719
1299.79	-25.4982	1299.79	-0.35888
1303.65	-20.4147	1303.65	-1.21734
1307.51	-16.9343	1307.51	-2.01676
1311.36	-14.6888	1311.36	-2.24931
1315.22	-10.8463	1315.22	-1.71189
1319.08	-5.03334	1319.08	-0.72879
1322.94	-0.32398	1322.94	0.05206
1326.79	1.31663	1326.79	0.39531
1330.65	0.20299	1330.65	0.38629
1334.51	-2.31018	1334.51	0.16727
1338.36	-5.4793	1338.36	-0.10233
1342.22	-8.64451	1342.22	-0.1558
1346.08	-11.6236	1346.08	0.02277
1349.93	-15.5888	1349.93	0.28847
1353.79	-20.6403	1353.79	0.49099
1357.65	-25.0522	1357.65	0.54133
1361.51	-27.1695	1361.51	0.58976
1365.36	-25.294	1365.36	0.65236
1369.22	-20.693	1369.22	0.61469
1373.08	-14.3792	1373.08	0.58453
1376.93	-8.13089	1376.93	0.63671
1380.79	-4.56669	1380.79	0.6197
1384.65	-2.54814	1384.65	0.58556
1388.5	-1.07875	1388.5	0.59448
1392.36	-0.60697	1392.36	0.54219
1396.22	-0.10141	1396.22	0.57782
1400.07	0.42178	1400.07	0.68885
1403.93	0.69771	1403.93	0.77939
1407.79	1.09962	1407.79	0.87388
1411.65	1.24775	1411.65	0.90346
1415.5	1.11767	1415.5	0.87445
1419.36	0.80727	1419.36	0.87257
1423.22	0.22508	1423.22	0.85199
1427.07	0.04641	1427.07	0.66022
1430.93	-0.49198	1430.93	0.34504
1434.79	-2.02412	1434.79	0.01543
1438.64	-5.0635	1438.64	-0.34185
1442.5	-7.38777	1442.5	-0.59674
1446.36	-9.56402	1446.36	-0.53467
1450.22	-12.1272	1450.22	-0.29936
1454.07	-13.7469	1454.07	-0.16396
1457.93	-13.2049	1457.93	0.38851
1461.79	-10.2971	1461.79	0.68068
1465.64	-6.54376	1465.64	0.50587
1469.5	-2.97916	1469.5	0.33344
1473.36	-0.91278	1473.36	0.43108
1477.21	0.00109	1477.21	0.64213
1481.07	-1.55844	1481.07	0.1954
1484.93	-4.26259	1484.93	-0.28757
1488.78	-9.68624	1488.78	-1.0816
1492.64	-15.2323	1492.64	-2.01623
1496.5	-20.6454	1496.5	-3.72301
1500.36	-26.5961	1500.36	-6.55973
1504.21	-29.9177	1504.21	-9.52501
1508.07	-28.7331	1508.07	-16.9065
1511.93	-24.9042	1511.93	-23.0405
1515.78	-20.6763	1515.78	-25.6181
1519.64	-13.7523	1519.64	-25.072
1523.5	-7.00135	1523.5	-16.2949
1527.35	-2.8013	1527.35	-7.84201
1531.21	-0.67476	1531.21	-2.91395
1535.07	0.16314	1535.07	-0.99274
1538.93	1.94064	1538.93	-0.15998
1542.78	0.74988	1542.78	0.31248
1546.64	-0.97323	1546.64	0.32693
1550.5	-3.51576	1550.5	0.00414
1554.35	-5.44652	1554.35	-0.28481
1558.21	-6.19807	1558.21	-0.10507
1562.07	-5.99489	1562.07	0.06012
1565.92	-5.29024	1565.92	-0.07425
1569.78	-4.67264	1569.78	-0.22263
1573.64	-2.96504	1573.64	-0.36545
1577.49	0.000786	1577.49	-0.54129
1581.35	-0.15922	1581.35	-0.72078
1585.21	-2.78633	1585.21	-0.99398
1589.07	-8.20283	1589.07	-1.4443
1592.92	-15.4627	1592.92	-1.96485
1596.78	-22.0604	1596.78	-2.45518
1600.64	-25.4568	1600.64	-2.97824
1604.49	-25.8983	1604.49	-3.71035
1608.35	-23.1389	1608.35	-4.43858
1612.21	-18.17	1612.21	-4.88177
1616.06	-10.8338	1616.06	-5.48694
1619.92	-4.12371	1619.92	-6.41664
1623.78	-0.31737	1623.78	-7.37807
1627.64	-0.49929	1627.64	-8.10101
1631.49	-2.59977	1631.49	-8.33698
1635.35	-7.16395	1635.35	-7.05869
1639.21	-13.5831	1639.21	-5.19343
1643.06	-20.721	1643.06	-4.38808
1646.92	-30.8619	1646.92	-3.44872
1650.78	-39.4501	1650.78	-2.50208
1654.63	-44.1393	1654.63	-1.62448
1658.49	-44.3767	1658.49	-1.2098
1662.35	-38.3885	1662.35	-0.94768
1666.2	-28.4958	1666.2	-0.59559
1670.06	-18.6262	1670.06	-0.35431
1673.92	-9.83079	1673.92	-0.02051
1677.78	-6.67434	1677.78	0.03752
1681.63	-4.49837	1681.63	0.01882
1685.49	-1.37029	1685.49	0.39304
1689.35	-1.04589	1689.35	0.43096
1693.2	-1.59875	1693.2	0.22275
1697.06	-0.76962	1697.06	0.17535
1700.92	0.67522	1700.92	0.36616
1704.77	1.02381	1704.77	0.41976
1708.63	0.88189	1708.63	0.32883
1712.49	0.36813	1712.49	0.17752
1716.35	0.66113	1716.35	0.3426
1720.2	1.37288	1720.2	0.63654
1724.06	0.83492	1724.06	0.51585
1727.92	0.19139	1727.92	0.30794
1731.77	-0.06251	1731.77	0.24296
1735.63	0.15789	1735.63	0.37205
1739.49	-0.17687	1739.49	0.36412
1743.34	-0.25983	1743.34	0.22156
1747.2	-0.0285	1747.2	0.16081
1751.06	0.42596	1751.06	0.21989
1754.91	0.48423	1754.91	0.13885
1758.77	0.45371	1758.77	0.04274
1762.63	0.68426	1762.63	0.06903
1766.49	0.53922	1766.49	-0.00586
1770.34	0.65792	1770.34	-0.00329
1774.2	1.21979	1774.2	0.17227
1778.06	1.22575	1778.06	0.1734
1781.91	1.35539	1781.91	0.19929
1785.77	1.37415	1785.77	0.19171
1789.63	1.32573	1789.63	0.13956
1793.48	1.61926	1793.48	0.20926
1797.34	1.7816	1797.34	0.24612
1801.2	1.88416	1801.2	0.25397
1805.05	1.90349	1805.05	0.22504
1808.91	1.87851	1808.91	0.16841
1812.77	2.01817	1812.77	0.17686
1816.63	2.04036	1816.63	0.13418
1820.48	1.89223	1820.48	0.01518
1824.34	1.82618	1824.34	-0.08443
1828.2	2.00411	1828.2	-0.08948
1832.05	2.21664	1832.05	-0.06409
1835.91	2.1034	1835.91	-0.16657
1839.77	1.85734	1839.77	-0.33199
1843.62	1.93118	1843.62	-0.39067
1847.48	2.17615	1847.48	-0.40248
1851.34	2.08985	1851.34	-0.55808
1855.2	1.93686	1855.2	-0.69731
1859.05	1.84042	1859.05	-0.70305
1862.91	1.58282	1862.91	-0.72516
1866.77	1.60959	1866.77	-0.61064
1870.62	2.08245	1870.62	-0.26263
1874.48	2.1812	1874.48	-0.09074
1878.34	2.1469	1878.34	-0.02034
1882.19	2.15634	1882.19	0.02817
1886.05	2.13676	1886.05	0.03464
1889.91	2.21622	1889.91	0.06644
1893.76	2.27585	1893.76	0.09085
1897.62	2.27533	1897.62	0.08857
1901.48	2.21919	1901.48	0.05408
1905.34	2.1421	1905.34	0.00275
1909.19	2.15369	1909.19	-0.0141
1913.05	2.0957	1913.05	-0.06138
1916.91	1.97445	1916.91	-0.14438
1920.76	2.0071	1920.76	-0.16509
1924.62	2.02716	1924.62	-0.17431
1928.48	1.92802	1928.48	-0.2262
1932.33	1.85996	1932.33	-0.26783
1936.19	1.74474	1936.19	-0.32021
1940.05	1.63148	1940.05	-0.37081
1943.91	1.71881	1943.91	-0.34196
1947.76	1.77486	1947.76	-0.31619
1951.62	1.69862	1951.62	-0.33521
1955.48	1.67076	1955.48	-0.32374
1959.33	1.62281	1959.33	-0.31178
1963.19	1.52241	1963.19	-0.31311
1967.05	1.51261	1967.05	-0.26923
1970.9	1.51377	1970.9	-0.21974
1974.76	1.43973	1974.76	-0.2088
1978.62	1.39337	1978.62	-0.18738
1982.47	1.33598	1982.47	-0.16063
1986.33	1.21388	1986.33	-0.161
1990.19	1.16132	1990.19	-0.13391
1994.05	1.16406	1994.05	-0.08433
1997.9	1.09248	1997.9	-0.07938
2001.76	1.01367	2001.76	-0.09306
2005.62	0.97602	2005.62	-0.09349
2009.47	0.91281	2009.47	-0.10728
2013.33	0.82736	2013.33	-0.13593
2017.19	0.79111	2017.19	-0.1367
2021.04	0.76561	2021.04	-0.12594
2024.9	0.69934	2024.9	-0.13608
2028.76	0.64471	2028.76	-0.14047
2032.62	0.58976	2032.62	-0.13824
2036.47	0.51968	2036.47	-0.13658
2040.33	0.47839	2040.33	-0.10987
2044.19	0.4528	2044.19	-0.06272
2048.04	0.41185	2048.04	-0.02139
2051.9	0.37209	2051.9	0.01746
2055.76	0.33729	2055.76	0.05482
2059.61	0.28258	2059.61	0.08686
2063.47	0.2353	2063.47	0.12747
2067.33	0.18881	2067.33	0.16509
2071.18	0.0981	2071.18	0.18934
2075.04	-0.00271	2075.04	0.21483
2078.9	-0.09801	2078.9	0.22721
2082.76	-0.20095	2082.76	0.21363
2086.61	-0.26573	2086.61	0.19707
2090.47	-0.25428	2090.47	0.18606
2094.33	-0.2148	2094.33	0.16996
2098.18	-0.20054	2098.18	0.1564
2102.04	-0.21005	2102.04	0.14804
2105.9	-0.23747	2105.9	0.13778
2109.75	-0.28034	2109.75	0.13142
2113.61	-0.33048	2113.61	0.13335
2117.47	-0.38541	2117.47	0.13784
2121.33	-0.43862	2121.33	0.13965
2125.18	-0.4733	2125.18	0.14492
2129.04	-0.48694	2129.04	0.154
2132.9	-0.48393	2132.9	0.16247
2136.75	-0.47499	2136.75	0.1753
2140.61	-0.4623	2140.61	0.19462
2144.47	-0.42921	2144.47	0.22363
2148.32	-0.39906	2148.32	0.25594
2152.18	-0.38361	2152.18	0.27932
2156.04	-0.33555	2156.04	0.29655
2159.89	-0.29332	2159.89	0.30943
2163.75	-0.25961	2163.75	0.31474
2167.61	-0.22448	2167.61	0.31472
2171.47	-0.17921	2171.47	0.30864
2175.32	-0.12936	2175.32	0.28926
2179.18	-0.06865	2179.18	0.26363
2183.04	0.00276	2183.04	0.24145
2186.89	0.06453	2186.89	0.2186
2190.75	0.1251	2190.75	0.20417
2194.61	0.18198	2194.61	0.20434
2198.46	0.22102	2198.46	0.20496
2202.32	0.25245	2202.32	0.20393
2206.18	0.28096	2206.18	0.20698
2210.04	0.30678	2210.04	0.21373
2213.89	0.3406	2213.89	0.2277
2217.75	0.38117	2217.75	0.24535
2221.61	0.42256	2221.61	0.26032
2225.46	0.47418	2225.46	0.2777
2229.32	0.533	2229.32	0.29607
2233.18	0.58317	2233.18	0.311
2237.03	0.61874	2237.03	0.32441
2240.89	0.64006	2240.89	0.33176
2244.75	0.64246	2244.75	0.33283
2248.6	0.63247	2248.6	0.33668
2252.46	0.62562	2252.46	0.34002
2256.32	0.62218	2256.32	0.32865
2260.18	0.63523	2260.18	0.30855
2264.03	0.66715	2264.03	0.29514
2267.89	0.6922	2267.89	0.28103
2271.75	0.70613	2271.75	0.26618
2275.6	0.70587	2275.6	0.26563
2279.46	0.67215	2279.46	0.26787
2283.32	0.6114	2283.32	0.24709
2287.17	0.55147	2287.17	0.19903
2291.03	0.49749	2291.03	0.1391
2294.89	0.4455	2294.89	0.07677
2298.75	0.39872	2298.75	0.00782
2302.6	0.33848	2302.6	-0.07817
2306.46	0.27828	2306.46	-0.18381
2310.32	0.26868	2310.32	-0.27348
2314.17	0.25503	2314.17	-0.35176
2318.03	0.22903	2318.03	-0.47539
2321.89	0.31544	2321.89	-0.59749
2325.74	0.40359	2325.74	-0.68725
2329.6	0.47161	2329.6	-0.75311
2333.46	0.56044	2333.46	-0.7481
2337.31	0.50622	2337.31	-0.78376
2341.17	0.65911	2341.17	-0.68869
2345.03	0.66272	2345.03	-0.45924
2348.89	0.09863	2348.89	-0.59425
2352.74	-0.32345	2352.74	-0.97825
2356.6	-0.07228	2356.6	-1.20325
2360.46	0.29485	2360.46	-1.09791
2364.31	0.64101	2364.31	-0.8171
2368.17	0.87928	2368.17	-0.42968
2372.03	0.96029	2372.03	-0.08623
2375.88	0.96053	2375.88	0.18334
2379.74	0.89404	2379.74	0.36408
2383.6	0.81921	2383.6	0.46649
2387.46	0.78587	2387.46	0.51115
2391.31	0.8019	2391.31	0.52396
2395.17	0.84927	2395.17	0.52827
2399.03	0.90672	2399.03	0.5319
2402.88	0.95704	2402.88	0.53488
2406.74	0.9979	2406.74	0.5457
2410.6	1.04797	2410.6	0.57754
2414.45	1.10202	2414.45	0.61233
2418.31	1.15086	2418.31	0.63425
2422.17	1.19393	2422.17	0.64985
2426.02	1.2289	2426.02	0.6603
2429.88	1.26018	2429.88	0.66936
2433.74	1.27841	2433.74	0.6774
2437.6	1.27428	2437.6	0.67595
2441.45	1.25663	2441.45	0.66654
2445.31	1.24344	2445.31	0.66077
2449.17	1.2434	2449.17	0.66136
2453.02	1.24763	2453.02	0.6607
2456.88	1.25449	2456.88	0.65843
2460.74	1.27478	2460.74	0.65759
2464.59	1.3058	2464.59	0.65317
2468.45	1.33359	2468.45	0.64518
2472.31	1.35307	2472.31	0.63683
2476.17	1.36742	2476.17	0.62884
2480.02	1.38626	2480.02	0.62791
2483.88	1.40286	2483.88	0.62893
2487.74	1.4147	2487.74	0.62197
2491.59	1.44402	2491.59	0.61537
2495.45	1.4846	2495.45	0.61435
2499.31	1.52749	2499.31	0.61369
2503.16	1.58172	2503.16	0.61289
2507.02	1.64012	2507.02	0.61548
2510.88	1.69465	2510.88	0.61858
2514.73	1.74267	2514.73	0.61908
2518.59	1.78241	2518.59	0.62157
2522.45	1.8109	2522.45	0.62784
2526.31	1.8239	2526.31	0.6378
2530.16	1.81916	2530.16	0.65626
2534.02	1.80116	2534.02	0.68886
2537.88	1.78174	2537.88	0.72367
2541.73	1.77104	2541.73	0.74134
2545.59	1.7782	2545.59	0.74694
2549.45	1.79472	2549.45	0.73911
2553.3	1.80468	2553.3	0.7108
2557.16	1.81605	2557.16	0.68244
2561.02	1.82614	2561.02	0.66183
2564.88	1.81085	2564.88	0.64601
2568.73	1.775	2568.73	0.64207
2572.59	1.73453	2572.59	0.64127
2576.45	1.68588	2576.45	0.63692
2580.3	1.633	2580.3	0.6293
2584.16	1.58429	2584.16	0.61318
2588.02	1.54244	2588.02	0.59484
2591.87	1.50872	2591.87	0.58319
2595.73	1.48092	2595.73	0.58076
2599.59	1.45716	2599.59	0.58301
2603.44	1.43942	2603.44	0.58485
2607.3	1.42763	2607.3	0.5996
2611.16	1.41364	2611.16	0.62824
2615.02	1.40348	2615.02	0.64576
2618.87	1.4086	2618.87	0.64903
2622.73	1.42618	2622.73	0.6538
2626.59	1.45355	2626.59	0.65724
2630.44	1.48838	2630.44	0.65174
2634.3	1.53066	2634.3	0.64453
2638.16	1.57333	2638.16	0.63419
2642.01	1.60227	2642.01	0.61078
2645.87	1.61331	2645.87	0.58347
2649.73	1.60827	2649.73	0.56449
2653.59	1.60163	2653.59	0.55562
2657.44	1.6058	2657.44	0.55322
2661.3	1.61357	2661.3	0.54627
2665.16	1.61602	2665.16	0.53522
2669.01	1.6025	2669.01	0.52982
2672.87	1.56335	2672.87	0.52918
2676.73	1.5023	2676.73	0.53036
2680.58	1.42877	2680.58	0.54019
2684.44	1.3493	2684.44	0.56585
2688.3	1.25798	2688.3	0.59996
2692.15	1.15251	2692.15	0.63554
2696.01	1.04089	2696.01	0.67595
2699.87	0.9163	2699.87	0.7178
2703.73	0.77992	2703.73	0.75192
2707.58	0.64773	2707.58	0.77262
2711.44	0.52637	2711.44	0.7818
2715.3	0.43121	2715.3	0.7865
2719.15	0.38191	2719.15	0.78606
2723.01	0.37732	2723.01	0.7775
2726.87	0.4099	2726.87	0.765
2730.72	0.48286	2730.72	0.74377
2734.58	0.58582	2734.58	0.70481
2738.44	0.68987	2738.44	0.65894
2742.3	0.78571	2742.3	0.62262
2746.15	0.87894	2746.15	0.60132
2750.01	0.95502	2750.01	0.58802
2753.87	0.99704	2753.87	0.57625
2757.72	1.01393	2757.72	0.57674
2761.58	1.02227	2761.58	0.5942
2765.44	1.02737	2765.44	0.62328
2769.29	1.029	2769.29	0.6614
2773.15	1.02757	2773.15	0.70193
2777.01	1.02355	2777.01	0.7404
2780.86	1.02567	2780.86	0.7727
2784.72	1.03831	2784.72	0.80184
2788.58	1.04865	2788.58	0.83301
2792.44	1.05264	2792.44	0.85233
2796.29	1.04798	2796.29	0.85693
2800.15	1.01858	2800.15	0.85346
2804.01	0.95246	2804.01	0.83246
2807.86	0.84426	2807.86	0.80107
2811.72	0.68945	2811.72	0.77428
2815.58	0.4917	2815.58	0.74099
2819.43	0.33311	2819.43	0.69126
2823.29	0.15519	2823.29	0.63441
2827.15	-0.02422	2827.15	0.57684
2831.01	-0.20612	2831.01	0.50797
2834.86	-0.41897	2834.86	0.41869
2838.72	-0.68915	2838.72	0.30051
2842.58	-1.04914	2842.58	0.10862
2846.43	-1.52259	2846.43	-0.17987
2850.29	-2.09527	2850.29	-0.45788
2854.15	-2.65852	2854.15	-0.55574
2858	-3.09041	2858	-0.46123
2861.86	-3.43338	2861.86	-0.31825
2865.72	-3.79511	2865.72	-0.22327
2869.57	-4.19443	2869.57	-0.16734
2873.43	-4.58671	2873.43	-0.11551
2877.29	-4.91761	2877.29	-0.06739
2881.15	-5.14845	2881.15	-0.03848
2885	-5.30432	2885	-0.02803
2888.86	-5.45823	2888.86	-0.03201
2892.72	-5.6495	2892.72	-0.05022
2896.57	-5.88861	2896.57	-0.07783
2900.43	-6.19568	2900.43	-0.12725
2904.29	-6.54114	2904.29	-0.23037
2908.14	-6.73886	2908.14	-0.41403
2912	-6.67568	2912	-0.70359
2915.86	-6.53252	2915.86	-1.07468
2919.71	-6.49509	2919.71	-1.40942
2923.57	-6.54632	2923.57	-1.56225
2927.43	-6.60937	2927.43	-1.4981
2931.29	-6.7724	2931.29	-1.31154
2935.14	-6.90839	2935.14	-1.08954
2939	-6.18755	2939	-0.87907
2942.86	-4.34698	2942.86	-0.70934
2946.71	-2.35661	2946.71	-0.59561
2950.57	-0.89285	2950.57	-0.5493
2954.43	0.12992	2954.43	-0.55798
2958.28	0.67478	2958.28	-0.57551
2962.14	0.85755	2962.14	-0.54878
2966	0.67302	2966	-0.46652
2969.86	0.2249	2969.86	-0.3491
2973.71	-0.23368	2973.71	-0.23177
2977.57	-0.51618	2977.57	-0.14844
2981.43	-0.57907	2981.43	-0.11794
2985.28	-0.84732	2985.28	-0.15115
2989.14	-0.98808	2989.14	-0.22342
2993	-1.09625	2993	-0.34841
2996.85	-1.24344	2996.85	-0.56276
3000.71	-1.46226	3000.71	-0.97216
3004.57	-1.81091	3004.57	-1.5647
3008.42	-2.31669	3008.42	-1.74459
3012.28	-2.95534	3012.28	-1.21671
3016.14	-3.70794	3016.14	-0.61761
3020	-4.54802	3020	-0.40933
3023.85	-5.45435	3023.85	-0.49672
3027.71	-6.40231	3027.71	-0.5242
3031.57	-7.3432	3031.57	-0.28908
3035.42	-8.27315	3035.42	-0.12745
3039.28	-9.21114	3039.28	-0.20233
3043.14	-10.1371	3043.14	-0.24366
3046.99	-11.0503	3046.99	-0.11436
3050.85	-11.9716	3050.85	0.03965
3054.71	-12.9183	3054.71	0.07689
3058.57	-13.902	3058.57	0.07751
3062.42	-14.9073	3062.42	0.0835
3066.28	-15.9213	3066.28	0.0782
3070.14	-16.9384	3070.14	0.07486
3073.99	-17.9405	3073.99	0.06396
3077.85	-18.8928	3077.85	0.05403
3081.71	-19.7938	3081.71	0.04271
3085.56	-20.6851	3085.56	0.00635
3089.42	-21.5802	3089.42	-0.05194
3093.28	-22.4731	3093.28	-0.07557
3097.13	-23.365	3097.13	-0.09843
3100.99	-24.26	3100.99	-0.10368
3104.85	-25.1602	3104.85	-0.0964
3108.71	-26.0652	3108.71	-0.1086
3112.56	-26.9783	3112.56	-0.15436
3116.42	-27.9007	3116.42	-0.21924
3120.28	-28.8264	3120.28	-0.29414
3124.13	-29.7464	3124.13	-0.37681
3127.99	-30.657	3127.99	-0.456
3131.85	-31.5468	3131.85	-0.50936
3135.7	-32.3981	3135.7	-0.54064
3139.56	-33.2261	3139.56	-0.56739
3143.42	-34.0459	3143.42	-0.59328
3147.28	-34.847	3147.28	-0.6358
3151.13	-35.6423	3151.13	-0.69831
3154.99	-36.4343	3154.99	-0.77259
3158.85	-37.2193	3158.85	-0.88041
3162.7	-38.0043	3162.7	-1.03502
3166.56	-38.7794	3166.56	-1.23098
3170.42	-39.5511	3170.42	-1.47442
3174.27	-40.3201	3174.27	-1.76645
3178.13	-41.0772	3178.13	-2.09609
3181.99	-41.8249	3181.99	-2.44662
3185.84	-42.5669	3185.84	-2.79
3189.7	-43.2888	3189.7	-3.08879
3193.56	-43.9702	3193.56	-3.292
3197.42	-44.6308	3197.42	-3.35037
3201.27	-45.2861	3201.27	-3.27153
3205.13	-45.9336	3205.13	-3.0763
3208.99	-46.575	3208.99	-2.75352
3212.84	-47.1998	3212.84	-2.3407
3216.7	-47.8013	3216.7	-1.87815
3220.56	-48.3915	3220.56	-1.40135
3224.41	-48.971	3224.41	-0.96849
3228.27	-49.5224	3228.27	-0.59433
3232.13	-50.0645	3232.13	-0.28629
3235.99	-50.6087	3235.99	-0.06404
3239.84	-51.1379	3239.84	0.0851
3243.7	-51.6505	3243.7	0.18706
3247.56	-52.1585	3247.56	0.17363
3251.41	-52.6669	3251.41	0.12363
3255.27	-53.1632	3255.27	0.05354
3259.13	-53.6546	3259.13	-0.04982
3262.98	-54.1529	3262.98	-0.19505
3266.84	-54.6579	3266.84	-0.37716
3270.7	-55.1565	3270.7	-0.57623
3274.55	-55.6484	3274.55	-0.79253
3278.41	-56.1497	3278.41	-1.05332
3282.27	-56.6588	3282.27	-1.34286
3286.13	-57.1728	3286.13	-1.6572
3289.98	-57.688	3289.98	-1.99422
3293.84	-58.2131	3293.84	-2.315
3297.7	-58.746	3297.7	-2.58671
3301.55	-59.2895	3301.55	-2.74966
3305.41	-59.8445	3305.41	-2.73086
3309.27	-60.3886	3309.27	-2.49099
3313.12	-60.9336	3313.12	-2.14041
3316.98	-61.4898	3316.98	-1.89896
3320.84	-62.0463	3320.84	-1.86192
3324.7	-62.5953	3324.7	-1.81546
3328.55	-63.145	3328.55	-1.33213
3332.41	-63.6843	3332.41	-0.39551
3336.27	-64.2048	3336.27	0.5347
3340.12	-64.7119	3340.12	0.70865
3343.98	-65.1939	3343.98	0.49977
3347.84	-65.6578	3347.84	0.06619
3351.69	-66.0878	3351.69	-0.55032
3355.55	-66.4838	3355.55	-1.34724
3359.41	-66.8535	3359.41	-2.42952
3363.26	-67.1971	3363.26	-3.88605
3367.12	-67.5045	3367.12	-6.00824
3370.98	-67.7513	3370.98	-8.32298
3374.84	-67.9757	3374.84	-8.86573
3378.69	-68.1781	3378.69	-7.75119
3382.55	-68.3546	3382.55	-6.68244
3386.41	-68.5328	3386.41	-5.71607
3390.26	-68.7154	3390.26	-4.28288
3394.12	-68.9099	3394.12	-3.59469
3397.98	-69.1136	3397.98	-3.53786
3401.83	-69.3183	3401.83	-3.3712
3405.69	-69.5247	3405.69	-3.63484
3409.55	-69.7455	3409.55	-3.65302
3413.41	-69.9541	3413.41	-2.26589
3417.26	-70.117	3417.26	-0.59894
3421.12	-70.2006	3421.12	0.15284
3424.98	-70.2186	3424.98	0.37925
3428.83	-70.1662	3428.83	0.37074
3432.69	-69.9554	3432.69	0.27375
3436.55	-69.578	3436.55	0.14589
3440.4	-69.0355	3440.4	0.04841
3444.26	-68.3143	3444.26	0.021
3448.12	-67.4365	3448.12	0.02257
3451.97	-66.5527	3451.97	-0.04047
3455.83	-65.7114	3455.83	-0.13692
3459.69	-64.8505	3459.69	-0.20271
3463.55	-64.0285	3463.55	-0.30382
3467.4	-63.2253	3467.4	-0.42489
3471.26	-62.4162	3471.26	-0.39389
3475.12	-61.6226	3475.12	-0.26665
3478.97	-60.846	3478.97	-0.16952
3482.83	-60.0456	3482.83	-0.0904
3486.69	-59.2477	3486.69	-0.04577
3490.54	-58.488	3490.54	-0.04549
3494.4	-57.7382	3494.4	-0.084
3498.26	-57.0165	3498.26	-0.11186
3502.12	-56.1909	3502.12	-0.06142
3505.97	-55.3368	3505.97	-0.00575
3509.83	-54.5372	3509.83	0.01898
3513.69	-53.7507	3513.69	0.02957
3517.54	-53.0682	3517.54	-0.02037
3521.4	-52.3088	3521.4	-0.03348
3525.26	-51.3419	3525.26	0.09803
3529.11	-50.3652	3529.11	0.19282
3532.97	-49.4727	3532.97	0.19853
3536.83	-48.542	3536.83	0.16142
3540.68	-47.6083	3540.68	0.07988
3544.54	-46.4413	3544.54	0.14651
3548.4	-45.0127	3548.4	0.2658
3552.26	-43.7795	3552.26	0.27498
3556.11	-42.4995	3556.11	0.22342
3559.97	-41.4721	3559.97	-0.00098
3563.83	-40.127	3563.83	0.02044
3567.68	-37.8365	3567.68	0.41108
3571.54	-36.4743	3571.54	0.3504
3575.4	-35.2164	3575.4	0.23077
3579.25	-33.8359	3579.25	0.14297
3583.11	-32.6573	3583.11	0.03675
3586.97	-30.691	3586.97	0.2697
3590.83	-28.941	3590.83	0.34575
3594.68	-27.6708	3594.68	0.2583
3598.54	-25.8945	3598.54	0.38594
3602.4	-24.6	3602.4	0.29059
3606.25	-23.3843	3606.25	0.22162
3610.11	-21.6233	3610.11	0.31581
3613.97	-20.1994	3613.97	0.33349
3617.82	-18.148	3617.82	0.58442
3621.68	-16.789	3621.68	0.44251
3625.54	-15.976	3625.54	0.24906
3629.39	-13.3454	3629.39	0.71318
3633.25	-11.6721	3633.25	0.80419
3637.11	-10.7642	3637.11	0.62567
3640.97	-9.97741	3640.97	0.34326
3644.82	-9.46486	3644.82	0.08761
3648.68	-6.70676	3648.68	0.65146
3652.54	-4.81603	3652.54	0.90203
3656.39	-4.13161	3656.39	0.7912
3660.25	-3.37708	3660.25	0.70645
3664.11	-3.42741	3664.11	0.38449
3667.96	-3.16277	3667.96	0.19795
3671.82	-2.09174	3671.82	0.41921
3675.68	-0.52865	3675.68	0.94144
3679.54	-0.22775	3679.54	0.86937
3683.39	-1.20504	3683.39	0.31284
3687.25	-1.02547	3687.25	0.35255
3691.11	0.45585	3691.11	0.87144
3694.96	0.17891	3694.96	0.61553
3698.82	0.06789	3698.82	0.49871
3702.68	0.18307	3702.68	0.46962
3706.53	-0.20531	3706.53	0.23836
3710.39	0.51197	3710.39	0.58932
3714.25	0.96292	3714.25	0.73891
3718.1	0.19882	3718.1	0.31237
3721.96	0.34543	3721.96	0.33813
3725.82	0.44731	3725.82	0.31753
3729.68	-0.22512	3729.68	-0.03877
3733.53	0.26448	3733.53	0.21256
3737.39	0.74749	3737.39	0.42925
3741.25	0.01927	3741.25	0.06624
3745.1	-0.07741	3745.1	0.0443
3748.96	0.94252	3748.96	0.53623
3752.82	1.22478	3752.82	0.6652
3756.67	1.05942	3756.67	0.59551
3760.53	0.83269	3760.53	0.48902
3764.39	0.62932	3764.39	0.39539
3768.25	0.94323	3768.25	0.56244
3772.1	0.94407	3772.1	0.5624
3775.96	0.56331	3775.96	0.38016
3779.82	0.68743	3779.82	0.4561
3783.67	0.92014	3783.67	0.57204
3787.53	0.79421	3787.53	0.505
3791.39	0.36428	3791.39	0.28861
3795.24	-0.06678	3795.24	0.08396
3799.1	0.16395	3799.1	0.21497
3802.96	0.90391	3802.96	0.58552
3806.81	1.02465	3806.81	0.63122
3810.67	0.32584	3810.67	0.26985
3814.53	-0.27073	3814.53	-0.0152
3818.39	0.27033	3818.39	0.26886
3822.24	0.86497	3822.24	0.55207
3826.1	0.47386	3826.1	0.35136
3829.96	-0.04714	3829.96	0.09689
3833.81	-0.31378	3833.81	-0.01355
3837.67	0.26313	3837.67	0.32712
3841.53	0.96405	3841.53	0.68261
3845.38	-0.03176	3845.38	0.15642
3849.24	-0.91588	3849.24	-0.25677
3853.1	0.43442	3853.1	0.45914
3856.96	0.57479	3856.96	0.49795
3860.81	-0.29814	3860.81	0.06538
3864.67	-0.35427	3864.67	0.05138
3868.53	0.03179	3868.53	0.25668
3872.38	0.29	3872.38	0.38772
3876.24	-0.12608	3876.24	0.16769
3880.1	-0.3433	3880.1	0.07412
3883.95	-0.07424	3883.95	0.22154
3887.81	-0.10544	3887.81	0.21701
3891.67	-0.18242	3891.67	0.19535
3895.52	-0.66726	3895.52	-0.05233
3899.38	-0.80636	3899.38	-0.09842
3903.24	0.25113	3903.24	0.45492
3907.1	0.1855	3907.1	0.38951
3910.95	-0.48494	3910.95	0.04746
3914.81	-0.68122	3914.81	-0.03538
3918.67	-0.49878	3918.67	0.0629
3922.52	-0.50825	3922.52	0.06198
3926.38	-0.67293	3926.38	-0.0104
3930.24	-0.53896	3930.24	0.06638
3934.09	-0.47664	3934.09	0.08525
3937.95	-0.73446	3937.95	-0.05747
3941.81	-0.81846	3941.81	-0.09285
3945.67	-0.71474	3945.67	-0.0276
3949.52	-0.64568	3949.52	0.01246
3953.38	-0.67655	3953.38	-0.00517
3957.24	-0.77231	3957.24	-0.04204
3961.09	-0.75446	3961.09	-0.01234
3964.95	-0.79224	3964.95	-0.02105
3968.81	-0.88965	3968.81	-0.06182
3972.66	-0.85568	3972.66	-0.04593
3976.52	-0.83736	3976.52	-0.04592
3980.38	-0.87287	3980.38	-0.0615
3984.23	-0.90303	3984.23	-0.07449
3988.09	-0.91877	3988.09	-0.08824
3991.95	-0.89293	3991.95	-0.07253
3995.81	-0.87384	3995.81	-0.05515
3999.66	-0.91907	3999.66	-0.08651
4003.52	-0.97067	4003.52	-0.12678
