# Supplementary material for: Facile hydrothermal synthesis of N-doped fluorescent carbon dots for selective detection of insecticide parathion
Source: Royal Society of Chemistry journal article supplement (doi:10.1039/d3ay00124e), 2023-01-01
Supplement: d3ay00124e5.csv [file d3ay00124e5.csv]

6
C1s
1
298.0000	1362.5000
297.8000	1363.8889
297.6000	1270.1389
297.4000	1367.3611
297.2000	1215.9723
297.0000	1274.3055
296.8000	1212.5000
296.6000	1203.4723
296.4000	1204.8611
296.2000	1147.2223
296.0000	1133.3334
295.8000	1134.7223
295.6000	1080.5555
295.4000	1090.2778
295.2000	1053.4723
295.0000	1045.8334
294.8000	1013.1945
294.6000	987.5000
294.4000	1019.4445
294.2000	925.0000
294.0000	905.5556
293.8000	959.7222
293.6000	907.6389
293.4000	858.3334
293.2000	836.1111
293.0000	863.1945
292.8000	751.3889
292.6000	780.5556
292.4000	727.0834
292.2000	741.6667
292.0000	729.8611
291.8000	722.2222
291.6000	679.1667
291.4000	681.9445
291.2000	664.5834
291.0000	694.4445
290.8000	654.1667
290.6000	667.3611
290.4000	663.1945
290.2000	683.3334
290.0000	645.1389
289.8000	661.8055
289.6000	634.0278
289.4000	608.3334
289.2000	605.5555
289.0000	631.9445
288.8000	652.0834
288.6000	668.7500
288.4000	677.7778
288.2000	715.9722
288.0000	749.3055
287.8000	806.2500
287.6000	917.3611
287.4000	1010.4167
287.2000	1093.7500
287.0000	1295.1389
286.8000	1454.1667
286.6000	1629.1667
286.4000	1934.0278
286.2000	2302.0835
286.0000	2640.2778
285.8000	3057.6389
285.6000	3612.5000
285.4000	4051.3889
285.2000	4622.9170
285.0000	5404.8613
284.8000	6288.1948
284.6000	7226.3892
284.4000	7874.3057
284.2000	8636.8057
284.0000	9030.5557
283.8000	9536.1113
283.6000	9779.8613
283.4000	10256.2500
283.2000	10707.6387
283.0000	10955.5557
282.8000	10586.1113
282.6000	9672.9170
282.4000	8150.0000
282.2000	6159.0278
282.0000	4582.6392
281.8000	3328.4724
281.6000	2194.4446
281.4000	1579.8612
281.2000	1113.1945
281.0000	837.5000
280.8000	665.9722
280.6000	568.7500
280.4000	498.6111
280.2000	429.8611
280.0000	357.6389
279.8000	379.1667
279.6000	322.2222
279.4000	335.4167
279.2000	281.2500
279.0000	295.1389
278.8000	253.4722
278.6000	261.1111
278.4000	242.3611
278.2000	265.2778
278.0000	288.8889
6
O1s
1
543.0000	2706.2500
542.8000	2597.2222
542.6000	2579.1667
542.4000	2632.6389
542.2000	2539.5835
542.0000	2551.3889
541.8000	2481.9446
541.6000	2488.1946
541.4000	2457.6389
541.2000	2455.5557
541.0000	2431.2500
540.8000	2417.3611
540.6000	2384.0278
540.4000	2400.0000
540.2000	2368.7500
540.0000	2364.5835
539.8000	2338.8889
539.6000	2356.2500
539.4000	2314.5835
539.2000	2268.7500
539.0000	2288.1946
538.8000	2286.1111
538.6000	2378.4722
538.4000	2348.6111
538.2000	2365.2778
538.0000	2314.5835
537.8000	2238.8889
537.6000	2326.3889
537.4000	2275.0000
537.2000	2207.6389
537.0000	2290.2778
536.8000	2236.8057
536.6000	2344.4446
536.4000	2252.0835
536.2000	2252.7778
536.0000	2279.8611
535.8000	2189.5835
535.6000	2247.9167
535.4000	2275.6946
535.2000	2239.5835
535.0000	2265.9722
534.8000	2252.7778
534.6000	2203.4722
534.4000	2286.8057
534.2000	2309.0278
534.0000	2261.1111
533.8000	2318.0557
533.6000	2428.4722
533.4000	2302.0835
533.2000	2472.9167
533.0000	2552.0835
532.8000	2556.2500
532.6000	2672.2222
532.4000	2927.0835
532.2000	3045.1389
532.0000	3247.2224
531.8000	3433.3335
531.6000	3850.0000
531.4000	4209.0278
531.2000	4596.5278
531.0000	5014.5835
530.8000	5343.0557
530.6000	5731.9443
530.4000	6020.1392
530.2000	6208.3335
530.0000	6234.7222
529.8000	6081.2500
529.6000	6043.0557
529.4000	5947.2222
529.2000	5867.3613
529.0000	5747.9170
528.8000	5648.6113
528.6000	5291.6670
528.4000	5053.4722
528.2000	4521.5278
528.0000	3941.6667
527.8000	3531.2500
527.6000	3029.8611
527.4000	2790.9722
527.2000	2490.9722
527.0000	2299.3057
526.8000	2293.0557
526.6000	2220.8335
526.4000	2127.7778
526.2000	2098.6111
526.0000	2124.3057
525.8000	2126.3889
525.6000	2129.8611
525.4000	2079.1667
525.2000	2075.0000
525.0000	2042.3612
524.8000	2103.4722
524.6000	2052.7778
524.4000	2091.6667
524.2000	2025.6945
524.0000	2038.8889
523.8000	2012.5000
523.6000	2029.8612
523.4000	2123.6111
523.2000	2035.4167
523.0000	2109.0278
6
N1s
1
411.0000	1888.1945
410.8000	1810.4167
410.6000	1877.7778
410.4000	1820.1389
410.2000	1846.5278
410.0000	1846.5278
409.8000	1916.6667
409.6000	1838.8889
409.4000	1870.8334
409.2000	1830.5555
409.0000	1892.3612
408.8000	1868.7500
408.6000	1793.7500
408.4000	1862.5000
408.2000	1825.0000
408.0000	1822.9167
407.8000	1834.7223
407.6000	1849.3055
407.4000	1809.0278
407.2000	1829.1667
407.0000	1738.8889
406.8000	1886.8055
406.6000	1752.7778
406.4000	1809.7223
406.2000	1781.9445
406.0000	1843.0555
405.8000	1790.2778
405.6000	1806.9445
405.4000	1882.6389
405.2000	1790.9723
405.0000	1831.2500
404.8000	1838.8889
404.6000	1832.6389
404.4000	1801.3889
404.2000	1842.3612
404.0000	1850.0000
403.8000	1792.3612
403.6000	1830.5555
403.4000	1824.3055
403.2000	1841.6667
403.0000	1817.3612
402.8000	1897.9167
402.6000	1929.1667
402.4000	2044.4445
402.2000	1986.1112
402.0000	2104.8611
401.8000	2165.2778
401.6000	2311.1111
401.4000	2504.1667
401.2000	2662.5000
401.0000	2837.5000
400.8000	3066.6667
400.6000	3086.8057
400.4000	3041.6667
400.2000	2906.9446
400.0000	2702.0835
399.8000	2455.5557
399.6000	2273.6111
399.4000	2181.9446
399.2000	2095.1389
399.0000	2186.8057
398.8000	2187.5000
398.6000	2213.8889
398.4000	2237.5000
398.2000	2282.6389
398.0000	2412.5000
397.8000	2465.2778
397.6000	2554.1667
397.4000	2662.5000
397.2000	2650.0000
397.0000	2604.1667
396.8000	2517.3611
396.6000	2495.1389
396.4000	2409.0278
396.2000	2234.7222
396.0000	2106.2500
395.8000	2100.0000
395.6000	1974.3055
395.4000	1939.5834
395.2000	1875.0000
395.0000	1826.3889
394.8000	1769.4445
394.6000	1745.1389
394.4000	1772.9167
394.2000	1763.1945
394.0000	1764.5834
393.8000	1729.8612
393.6000	1683.3334
393.4000	1794.4445
393.2000	1813.8889
393.0000	1730.5555
392.8000	1787.5000
392.6000	1795.8334
392.4000	1774.3055
392.2000	1756.9445
392.0000	1741.6667
391.8000	1718.7500
391.6000	1770.1389
391.4000	1826.3889
391.2000	1729.8612
391.0000	1708.3334
