# Supplementary material for: Facile hydrothermal synthesis of N-doped fluorescent carbon dots for selective detection of insecticide parathion
Source: Royal Society of Chemistry journal article supplement (doi:10.1039/d3ay00124e), 2023-01-01
Supplement: d3ay00124e6.xlsx [file d3ay00124e6.xlsx]

## Sheet: Sheet1
[Measurement conditions]
Sample identification
Angle	Intensity
10.0066	131
10.0197	129
10.0328	129
10.046	150
10.0591	134
10.0722	137
10.0854	147
10.0985	154
10.1116	137
10.1247	141
10.1379	159
10.151	156
10.1641	150
10.1773	160
10.1904	131
10.2035	148
10.2166	141
10.2298	120
10.2429	150
10.256	132
10.2692	152
10.2823	136
10.2954	135
10.3086	137
10.3217	148
10.3348	151
10.348	132
10.3611	141
10.3742	128
10.3873	162
10.4005	123
10.4136	133
10.4267	126
10.4399	154
10.453	141
10.4661	132
10.4793	133
10.4924	159
10.5055	152
10.5186	163
10.5318	141
10.5449	149
10.558	132
10.5712	117
10.5843	142
10.5974	132
10.6106	144
10.6237	137
10.6368	129
10.65	131
10.6631	147
10.6762	149
10.6893	146
10.7025	173
10.7156	136
10.7287	137
10.7419	141
10.755	136
10.7681	127
10.7812	150
10.7944	142
10.8075	167
10.8206	129
10.8338	152
10.8469	144
10.86	132
10.8732	151
10.8863	141
10.8994	134
10.9125	126
10.9257	144
10.9388	135
10.952	131
10.9651	149
10.9782	137
10.9913	138
11.0045	146
11.0176	150
11.0307	167
11.0439	141
11.057	143
11.0701	127
11.0832	157
11.0964	152
11.1095	138
11.1226	130
11.1358	125
11.1489	142
11.162	132
11.1752	144
11.1883	180
11.2014	160
11.2145	140
11.2277	154
11.2408	140
11.2539	136
11.2671	134
11.2802	150
11.2933	154
11.3065	134
11.3196	147
11.3327	165
11.3459	143
11.359	130
11.3721	133
11.3852	158
11.3984	126
11.4115	128
11.4246	172
11.4378	137
11.4509	141
11.464	136
11.4772	154
11.4903	127
11.5034	143
11.5166	152
11.5297	147
11.5428	145
11.5559	162
11.5691	118
11.5822	135
11.5953	153
11.6085	161
11.6216	150
11.6347	143
11.6479	136
11.661	162
11.6741	138
11.6872	128
11.7004	138
11.7135	146
11.7266	132
11.7398	148
11.7529	144
11.766	134
11.7791	131
11.7923	142
11.8054	134
11.8185	141
11.8317	159
11.8448	148
11.8579	146
11.8711	145
11.8842	185
11.8973	143
11.9105	177
11.9236	149
11.9367	146
11.9498	136
11.963	148
11.9761	149
11.9892	152
12.0024	138
12.0155	153
12.0286	151
12.0418	141
12.0549	136
12.068	126
12.0811	175
12.0943	136
12.1074	132
12.1205	157
12.1337	150
12.1468	146
12.1599	149
12.1731	156
12.1862	144
12.1993	153
12.2125	152
12.2256	142
12.2387	154
12.2518	160
12.265	164
12.2781	167
12.2912	171
12.3044	154
12.3175	149
12.3306	147
12.3438	145
12.3569	117
12.37	159
12.3832	146
12.3963	152
12.4094	160
12.4225	158
12.4357	146
12.4488	149
12.4619	196
12.4751	135
12.4882	162
12.5013	142
12.5145	146
12.5276	168
12.5407	156
12.5538	168
12.567	166
12.5801	113
12.5932	160
12.6064	157
12.6195	132
12.6326	149
12.6457	149
12.6589	156
12.672	141
12.6851	126
12.6983	175
12.7114	176
12.7245	147
12.7377	141
12.7508	149
12.7639	156
12.777	160
12.7902	148
12.8033	166
12.8164	156
12.8296	145
12.8427	186
12.8558	149
12.869	156
12.8821	160
12.8952	144
12.9084	147
12.9215	139
12.9346	161
12.9477	158
12.9609	163
12.974	167
12.9871	171
13.0003	145
13.0134	165
13.0265	155
13.0397	136
13.0528	174
13.0659	164
13.0791	165
13.0922	157
13.1053	157
13.1184	157
13.1316	164
13.1447	146
13.1578	175
13.171	152
13.1841	176
13.1972	179
13.2104	142
13.2235	181
13.2366	165
13.2497	171
13.2629	169
13.276	165
13.2891	169
13.3023	173
13.3154	163
13.3285	189
13.3417	172
13.3548	177
13.3679	181
13.3811	168
13.3942	195
13.4073	151
13.4204	160
13.4336	167
13.4467	150
13.4598	163
13.473	155
13.4861	180
13.4992	148
13.5123	162
13.5255	173
13.5386	178
13.5517	152
13.5649	157
13.578	188
13.5911	151
13.6043	181
13.6174	171
13.6305	159
13.6436	150
13.6568	188
13.6699	182
13.683	168
13.6962	161
13.7093	160
13.7224	171
13.7356	193
13.7487	152
13.7618	163
13.775	142
13.7881	135
13.8012	175
13.8143	175
13.8275	152
13.8406	174
13.8537	178
13.8669	170
13.88	174
13.8931	173
13.9063	151
13.9194	176
13.9325	204
13.9457	154
13.9588	149
13.9719	169
13.985	180
13.9982	184
14.0113	171
14.0244	181
14.0376	169
14.0507	185
14.0638	177
14.077	173
14.0901	173
14.1032	197
14.1163	184
14.1295	175
14.1426	166
14.1557	168
14.1689	167
14.182	171
14.1951	168
14.2083	186
14.2214	186
14.2345	154
14.2477	220
14.2608	155
14.2739	183
14.287	186
14.3002	151
14.3133	182
14.3264	151
14.3396	213
14.3527	186
14.3658	177
14.3789	185
14.3921	164
14.4052	183
14.4183	188
14.4315	192
14.4446	212
14.4577	188
14.4709	191
14.484	186
14.4971	199
14.5102	171
14.5234	205
14.5365	190
14.5496	169
14.5628	216
14.5759	195
14.589	194
14.6022	181
14.6153	199
14.6284	205
14.6416	187
14.6547	163
14.6678	204
14.6809	184
14.6941	195
14.7072	192
14.7203	201
14.7335	208
14.7466	184
14.7597	201
14.7729	203
14.786	198
14.7991	191
14.8123	198
14.8254	182
14.8385	171
14.8516	197
14.8648	210
14.8779	225
14.891	205
14.9042	226
14.9173	192
14.9304	213
14.9436	190
14.9567	227
14.9698	197
14.9829	187
14.9961	176
15.0092	179
15.0223	177
15.0355	201
15.0486	200
15.0617	188
15.0748	205
15.088	191
15.1011	181
15.1143	207
15.1274	191
15.1405	200
15.1536	213
15.1668	202
15.1799	220
15.193	210
15.2062	213
15.2193	218
15.2324	214
15.2455	228
15.2587	208
15.2718	213
15.2849	194
15.2981	208
15.3112	209
15.3243	222
15.3375	189
15.3506	222
15.3637	211
15.3768	204
15.39	204
15.4031	221
15.4162	216
15.4294	205
15.4425	245
15.4556	212
15.4688	204
15.4819	208
15.495	237
15.5082	213
15.5213	231
15.5344	215
15.5475	203
15.5607	229
15.5738	238
15.5869	228
15.6001	250
15.6132	217
15.6263	214
15.6395	213
15.6526	183
15.6657	240
15.6789	224
15.692	215
15.7051	214
15.7182	201
15.7314	224
15.7445	221
15.7576	214
15.7708	199
15.7839	214
15.797	238
15.8102	223
15.8233	227
15.8364	245
15.8495	230
15.8627	236
15.8758	212
15.8889	231
15.9021	213
15.9152	231
15.9283	242
15.9414	218
15.9546	231
15.9677	270
15.9808	208
15.994	260
16.0071	252
16.0202	209
16.0334	213
16.0465	236
16.0596	235
16.0728	239
16.0859	235
16.099	212
16.1121	251
16.1253	217
16.1384	233
16.1515	237
16.1647	267
16.1778	238
16.1909	235
16.2041	227
16.2172	258
16.2303	238
16.2434	217
16.2566	244
16.2697	227
16.2828	244
16.296	264
16.3091	238
16.3222	241
16.3354	251
16.3485	278
16.3616	220
16.3747	250
16.3879	254
16.401	259
16.4141	202
16.4273	237
16.4404	224
16.4535	234
16.4667	218
16.4798	275
16.4929	271
16.5061	295
16.5192	270
16.5323	267
16.5454	246
16.5586	262
16.5717	256
16.5848	258
16.598	236
16.6111	246
16.6242	278
16.6374	251
16.6505	267
16.6636	241
16.6767	260
16.6899	242
16.703	203
16.7161	250
16.7293	272
16.7424	253
16.7555	260
16.7687	272
16.7818	273
16.7949	245
16.8081	241
16.8212	261
16.8343	242
16.8474	264
16.8606	278
16.8737	245
16.8868	263
16.9	249
16.9131	249
16.9262	242
16.9394	242
16.9525	259
16.9656	244
16.9788	247
16.9919	252
17.005	256
17.0181	238
17.0313	256
17.0444	253
17.0575	274
17.0707	268
17.0838	264
17.0969	252
17.1101	264
17.1232	288
17.1363	270
17.1494	290
17.1626	260
17.1757	310
17.1888	270
17.202	289
17.2151	274
17.2282	272
17.2414	295
17.2545	268
17.2676	288
17.2807	279
17.2939	260
17.307	205
17.3201	283
17.3333	291
17.3464	285
17.3595	288
17.3727	288
17.3858	229
17.3989	202
17.412	202
17.4252	288
17.4383	230
17.4514	214
17.4646	247
17.4777	229
17.4908	232
17.504	243
17.5171	290
17.5302	280
17.5434	299
17.5565	281
17.5696	259
17.5827	262
17.5959	273
17.609	268
17.6221	279
17.6353	246
17.6484	276
17.6615	258
17.6746	255
17.6878	270
17.7009	251
17.714	245
17.7272	201
17.7403	209
17.7534	295
17.7666	296
17.7797	268
17.7928	270
17.8059	248
17.8191	281
17.8322	276
17.8453	268
17.8585	263
17.8716	284
17.8847	264
17.8979	292
17.911	298
17.9241	292
17.9373	293
17.9504	255
17.9635	272
17.9766	247
17.9898	287
18.0029	298
18.016	293
18.0292	298
18.0423	300
18.0554	249
18.0686	286
18.0817	307
18.0948	299
18.1079	296
18.1211	301
18.1342	297
18.1473	287
18.1605	282
18.1736	284
18.1867	279
18.1999	207
18.213	233
18.2261	231
18.2392	220
18.2524	267
18.2655	251
18.2786	278
18.2918	267
18.3049	262
18.318	291
18.3312	260
18.3443	291
18.3574	306
18.3706	308
18.3837	290
18.3968	295
18.4099	294
18.4231	307
18.4362	300
18.4493	293
18.4625	299
18.4756	295
18.4887	271
18.5019	285
18.515	258
18.5281	255
18.5413	281
18.5544	243
18.5675	210
18.5806	230
18.5938	217
18.6069	213
18.62	282
18.6332	309
18.6463	286
18.6594	283
18.6726	270
18.6857	308
18.6988	305
18.7119	278
18.7251	286
18.7382	263
18.7513	276
18.7645	283
18.7776	302
18.7907	310
18.8039	280
18.817	275
18.8301	278
18.8433	314
18.8564	280
18.8695	287
18.8826	256
18.8958	286
18.9089	287
18.922	262
18.9352	258
18.9483	258
18.9614	278
18.9746	267
18.9877	269
19.0008	273
19.0139	282
19.0271	238
19.0402	288
19.0533	274
19.0665	257
19.0796	288
19.0927	268
19.1059	287
19.119	250
19.1321	276
19.1452	280
19.1584	264
19.1715	299
19.1846	271
19.1978	272
19.2109	258
19.224	284
19.2371	306
19.2503	299
19.2634	285
19.2765	300
19.2897	298
19.3028	309
19.3159	309
19.3291	292
19.3422	309
19.3553	234
19.3685	225
19.3816	229
19.3947	264
19.4078	279
19.421	283
19.4341	268
19.4472	264
19.4604	264
19.4735	275
19.4866	306
19.4998	272
19.5129	296
19.526	299
19.5391	274
19.5523	313
19.5654	311
19.5785	294
19.5917	288
19.6048	296
19.6179	249
19.6311	263
19.6442	216
19.6573	225
19.6704	226
19.6836	256
19.6967	290
19.7098	279
19.723	256
19.7361	267
19.7492	287
19.7624	280
19.7755	283
19.7886	258
19.8018	284
19.8149	284
19.828	256
19.8411	267
19.8543	279
19.8674	259
19.8805	250
19.8937	262
19.9068	243
19.9199	258
19.9331	268
19.9462	272
19.9593	273
19.9724	292
19.9856	295
19.9987	265
20.0118	289
20.025	255
20.0381	241
20.0512	285
20.0644	264
20.0775	265
20.0906	258
20.1038	268
20.1169	252
20.13	285
20.1431	278
20.1563	287
20.1694	280
20.1825	265
20.1957	262
20.2088	243
20.2219	278
20.2351	286
20.2482	277
20.2613	259
20.2745	250
20.2876	273
20.3007	248
20.3138	241
20.327	253
20.3401	260
20.3532	286
20.3664	285
20.3795	292
20.3926	230
20.4058	271
20.4189	304
20.432	258
20.4451	265
20.4583	268
20.4714	242
20.4845	282
20.4977	256
20.5108	242
20.5239	267
20.5371	267
20.5502	284
20.5633	276
20.5764	243
20.5896	262
20.6027	253
20.6158	251
20.629	281
20.6421	266
20.6552	263
20.6684	241
20.6815	281
20.6946	282
20.7078	268
20.7209	282
20.734	281
20.7471	280
20.7603	277
20.7734	260
20.7865	246
20.7997	263
20.8128	271
20.8259	269
20.8391	283
20.8522	296
20.8653	291
20.8784	269
20.8916	282
20.9047	289
20.9178	307
20.931	293
20.9441	285
20.9572	260
20.9703	261
20.9835	261
20.9966	262
21.0097	272
21.0229	264
21.036	279
21.0491	272
21.0623	270
21.0754	279
21.0885	259
21.1016	263
21.1148	286
21.1279	279
21.141	286
21.1542	281
21.1673	279
21.1804	281
21.1936	274
21.2067	290
21.2198	252
21.233	258
21.2461	239
21.2592	267
21.2723	278
21.2855	239
21.2986	249
21.3117	253
21.3249	256
21.338	278
21.3511	281
21.3643	284
21.3774	271
21.3905	252
21.4036	297
21.4168	230
21.4299	292
21.443	264
21.4562	297
21.4693	276
21.4824	281
21.4956	263
21.5087	267
21.5218	253
21.5349	279
21.5481	269
21.5612	276
21.5743	273
21.5875	263
21.6006	316
21.6137	254
21.6269	283
21.64	275
21.6531	261
21.6663	257
21.6794	239
21.6925	268
21.7056	269
21.7188	257
21.7319	271
21.745	242
21.7582	316
21.7713	253
21.7844	271
21.7976	269
21.8107	248
21.8238	251
21.837	259
21.8501	256
21.8632	263
21.8763	271
21.8895	272
21.9026	246
21.9157	232
21.9289	249
21.942	307
21.9551	276
21.9683	245
21.9814	256
21.9945	266
22.0076	248
22.0208	265
22.0339	252
22.047	289
22.0602	251
22.0733	278
22.0864	263
22.0996	280
22.1127	271
22.1258	239
22.139	249
22.1521	252
22.1652	301
22.1783	242
22.1915	249
22.2046	254
22.2177	275
22.2309	275
22.244	272
22.2571	273
22.2703	254
22.2834	286
22.2965	253
22.3096	256
22.3228	270
22.3359	239
22.349	254
22.3622	263
22.3753	266
22.3884	269
22.4016	275
22.4147	269
22.4278	244
22.4409	246
22.4541	271
22.4672	259
22.4803	278
22.4935	255
22.5066	314
22.5197	244
22.5328	263
22.546	239
22.5591	281
22.5723	271
22.5854	277
22.5985	241
22.6116	266
22.6248	264
22.6379	261
22.651	273
22.6642	271
22.6773	268
22.6904	277
22.7035	291
22.7167	236
22.7298	249
22.7429	264
22.7561	258
22.7692	265
22.7823	249
22.7955	243
22.8086	279
22.8217	258
22.8348	257
22.848	284
22.8611	278
22.8742	251
22.8874	281
22.9005	303
22.9136	235
22.9268	268
22.9399	283
22.953	235
22.9661	288
22.9793	272
22.9924	253
23.0055	277
23.0187	270
23.0318	263
23.0449	282
23.0581	274
23.0712	261
23.0843	286
23.0975	267
23.1106	273
23.1237	261
23.1368	284
23.15	275
23.1631	253
23.1762	244
23.1894	295
23.2025	283
23.2156	273
23.2288	279
23.2419	287
23.255	301
23.2681	261
23.2813	252
23.2944	294
23.3075	283
23.3207	267
23.3338	268
23.3469	290
23.3601	302
23.3732	272
23.3863	297
23.3995	293
23.4126	290
23.4257	297
23.4388	291
23.452	276
23.4651	270
23.4782	285
23.4914	299
23.5045	285
23.5176	253
23.5308	314
23.5439	283
23.557	293
23.5702	265
23.5833	284
23.5964	299
23.6095	272
23.6227	300
23.6358	232
23.6489	251
23.6621	259
23.6752	272
23.6883	269
23.7015	282
23.7146	252
23.7277	268
23.7408	255
23.754	258
23.7671	272
23.7802	258
23.7934	262
23.8065	257
23.8196	271
23.8328	279
23.8459	270
23.859	252
23.8721	259
23.8853	273
23.8984	264
23.9115	250
23.9247	270
23.9378	263
23.9509	264
23.9641	251
23.9772	258
23.9903	283
24.0035	282
24.0166	259
24.0297	242
24.0428	263
24.056	269
24.0691	253
24.0822	257
24.0954	244
24.1085	264
24.1216	261
24.1348	263
24.1479	281
24.161	254
24.1741	275
24.1873	258
24.2004	296
24.2135	271
24.2267	242
24.2398	275
24.2529	291
24.266	266
24.2792	254
24.2923	268
24.3054	269
24.3186	234
24.3317	238
24.3448	254
24.358	274
24.3711	284
24.3842	272
24.3973	280
24.4105	270
24.4236	265
24.4367	275
24.4499	258
24.463	257
24.4761	277
24.4893	263
24.5024	281
24.5155	257
24.5287	258
24.5418	267
24.5549	246
24.568	255
24.5812	240
24.5943	256
24.6074	246
24.6206	224
24.6337	263
24.6468	250
24.66	248
24.6731	255
24.6862	259
24.6993	258
24.7125	257
24.7256	270
24.7387	263
24.7519	242
24.765	245
24.7781	252
24.7913	242
24.8044	236
24.8175	262
24.8306	253
24.8438	260
24.8569	263
24.87	258
24.8832	248
24.8963	282
24.9094	261
24.9226	248
24.9357	270
24.9488	270
24.962	281
24.9751	269
24.9882	274
25.0013	287
25.0145	278
25.0276	268
25.0407	265
25.0539	244
25.067	262
25.0801	242
25.0933	247
25.1064	261
25.1195	224
25.1327	261
25.1458	284
25.1589	266
25.172	274
25.1852	260
25.1983	233
25.2114	247
25.2246	253
25.2377	239
25.2508	264
25.264	247
25.2771	221
25.2902	235
25.3033	250
25.3165	251
25.3296	246
25.3427	248
25.3559	242
25.369	269
25.3821	241
25.3953	237
25.4084	232
25.4215	259
25.4347	240
25.4478	256
25.4609	233
25.474	220
25.4872	248
25.5003	202
25.5134	246
25.5266	252
25.5397	204
25.5528	240
25.566	267
25.5791	237
25.5922	267
25.6053	250
25.6185	237
25.6316	261
25.6447	263
25.6579	240
25.671	247
25.6841	279
25.6973	252
25.7104	269
25.7235	246
25.7366	248
25.7498	267
25.7629	284
25.776	262
25.7892	279
25.8023	286
25.8154	278
25.8286	238
25.8417	249
25.8548	263
25.868	253
25.8811	292
25.8942	236
25.9073	258
25.9205	266
25.9336	269
25.9467	267
25.9599	256
25.973	270
25.9861	274
25.9992	261
26.0124	259
26.0255	251
26.0386	267
26.0518	253
26.0649	270
26.078	286
26.0912	271
26.1043	261
26.1174	296
26.1305	283
26.1437	268
26.1568	306
26.1699	294
26.1831	281
26.1962	272
26.2093	256
26.2225	245
26.2356	282
26.2487	234
26.2619	245
26.275	248
26.2881	224
26.3012	246
26.3144	233
26.3275	230
26.3406	232
26.3538	230
26.3669	231
26.38	249
26.3932	229
26.4063	257
26.4194	234
26.4325	245
26.4457	261
26.4588	236
26.4719	201
26.4851	266
26.4982	277
26.5113	253
26.5245	291
26.5376	250
26.5507	246
26.5638	243
26.577	267
26.5901	279
26.6032	257
26.6164	239
26.6295	253
26.6426	258
26.6558	247
26.6689	228
26.682	245
26.6952	231
26.7083	216
26.7214	233
26.7345	228
26.7477	220
26.7608	234
26.7739	218
26.7871	247
26.8002	229
26.8133	231
26.8265	233
26.8396	232
26.8527	243
26.8658	229
26.879	238
26.8921	229
26.9052	216
26.9184	234
26.9315	207
26.9446	237
26.9578	265
26.9709	218
26.984	230
26.9972	240
27.0103	248
27.0234	234
27.0365	237
27.0497	194
27.0628	202
27.0759	205
27.0891	235
27.1022	216
27.1153	223
27.1285	238
27.1416	183
27.1547	198
27.1678	233
27.181	200
27.1941	218
27.2072	222
27.2204	219
27.2335	202
27.2466	198
27.2598	217
27.2729	210
27.286	184
27.2992	218
27.3123	206
27.3254	210
27.3385	207
27.3517	202
27.3648	209
27.3779	180
27.3911	177
27.4042	205
27.4173	193
27.4305	212
27.4436	233
27.4567	211
27.4698	224
27.483	192
27.4961	223
27.5092	180
27.5224	222
27.5355	195
27.5486	221
27.5617	220
27.5749	214
27.588	198
27.6011	234
27.6143	208
27.6274	212
27.6405	219
27.6537	205
27.6668	216
27.6799	187
27.6931	198
27.7062	175
27.7193	193
27.7325	214
27.7456	181
27.7587	219
27.7718	181
27.785	181
27.7981	187
27.8112	191
27.8244	178
27.8375	213
27.8506	220
27.8637	191
27.8769	190
27.89	220
27.9031	168
27.9163	173
27.9294	213
27.9425	198
27.9557	172
27.9688	182
27.9819	190
27.995	175
28.0082	213
28.0213	221
28.0344	164
28.0476	203
28.0607	180
28.0738	189
28.087	191
28.1001	201
28.1132	213
28.1264	199
28.1395	219
28.1526	189
28.1657	217
28.1789	199
28.192	222
28.2051	218
28.2183	230
28.2314	222
28.2445	192
28.2577	270
28.2708	239
28.2839	221
28.297	256
28.3102	242
28.3233	241
28.3364	202
28.3496	237
28.3627	224
28.3758	215
28.389	225
28.4021	203
28.4152	219
28.4283	244
28.4415	211
28.4546	218
28.4677	222
28.4809	193
28.494	202
28.5071	203
28.5203	210
28.5334	171
28.5465	164
28.5597	162
28.5728	165
28.5859	186
28.599	206
28.6122	179
28.6253	184
28.6384	167
28.6516	182
28.6647	184
28.6778	198
28.691	188
28.7041	176
28.7172	167
28.7304	178
28.7435	185
28.7566	190
28.7697	159
28.7829	170
28.796	207
28.8091	183
28.8223	158
28.8354	179
28.8485	187
28.8617	157
28.8748	185
28.8879	166
28.901	161
28.9142	182
28.9273	170
28.9404	175
28.9536	185
28.9667	179
28.9798	183
28.993	157
29.0061	154
29.0192	173
29.0323	175
29.0455	171
29.0586	184
29.0717	181
29.0849	171
29.098	172
29.1111	156
29.1243	176
29.1374	168
29.1505	169
29.1637	186
29.1768	167
29.1899	185
29.203	165
29.2162	172
29.2293	189
29.2424	174
29.2556	191
29.2687	181
29.2818	184
29.295	178
29.3081	193
29.3212	189
29.3343	172
29.3475	177
29.3606	180
29.3737	197
29.3869	181
29.4	175
29.4131	183
29.4262	183
29.4394	184
29.4525	164
29.4656	179
29.4788	168
29.4919	164
29.505	189
29.5182	164
29.5313	168
29.5444	164
29.5576	168
29.5707	175
29.5838	178
29.5969	176
29.6101	173
29.6232	185
29.6363	161
29.6495	168
29.6626	156
29.6757	155
29.6889	169
29.702	157
29.7151	155
29.7282	137
29.7414	146
29.7545	152
29.7676	169
29.7808	170
29.7939	139
29.807	172
29.8202	168
29.8333	159
29.8464	165
29.8595	169
29.8727	168
29.8858	155
29.8989	138
29.9121	146
29.9252	146
29.9383	153
29.9515	152
29.9646	144
29.9777	156
29.9909	141
30.004	151
30.0171	152
30.0302	153
30.0434	156
30.0565	165
30.0696	162
30.0828	151
30.0959	166
30.109	136
30.1222	149
30.1353	135
30.1484	166
30.1615	157
30.1747	161
30.1878	160
30.2009	147
30.2141	152
30.2272	117
30.2403	148
30.2535	140
30.2666	135
30.2797	126
30.2929	143
30.306	153
30.3191	133
30.3322	145
30.3454	146
30.3585	155
30.3716	169
30.3848	160
30.3979	155
30.411	149
30.4242	144
30.4373	134
30.4504	140
30.4636	159
30.4767	143
30.4898	160
30.5029	150
30.5161	167
30.5292	155
30.5423	129
30.5555	150
30.5686	122
30.5817	142
30.5949	138
30.608	143
30.6211	143
30.6342	145
30.6474	140
30.6605	168
30.6736	135
30.6868	163
30.6999	137
30.713	116
30.7262	152
30.7393	143
30.7524	138
30.7655	139
30.7787	150
30.7918	145
30.8049	162
30.8181	135
30.8312	132
30.8443	138
30.8575	146
30.8706	156
30.8837	153
30.8968	147
30.91	153
30.9231	123
30.9362	144
30.9494	124
30.9625	146
30.9756	151
30.9888	149
31.0019	145
31.015	131
31.0282	136
31.0413	140
31.0544	157
31.0675	157
31.0807	144
31.0938	142
31.1069	160
31.1201	173
31.1332	141
31.1463	145
31.1594	140
31.1726	148
31.1857	152
31.1988	143
31.212	99
31.2251	146
31.2382	112
31.2514	137
31.2645	129
31.2776	138
31.2907	148
31.3039	124
31.317	145
31.3301	123
31.3433	132
31.3564	132
31.3695	134
31.3827	167
31.3958	146
31.4089	120
31.4221	143
31.4352	141
31.4483	116
31.4614	129
31.4746	144
31.4877	123
31.5008	137
31.514	150
31.5271	140
31.5402	116
31.5534	137
31.5665	143
31.5796	111
31.5927	120
31.6059	163
31.619	143
31.6321	152
31.6453	134
31.6584	152
31.6715	149
31.6847	141
31.6978	130
31.7109	145
31.724	156
31.7372	152
31.7503	133
31.7634	151
31.7766	156
31.7897	129
31.8028	124
31.816	140
31.8291	144
31.8422	133
31.8554	124
31.8685	134
31.8816	122
31.8947	126
31.9079	147
31.921	149
31.9341	124
31.9473	122
31.9604	122
31.9735	160
31.9867	139
31.9998	120
32.0129	142
32.026	144
32.0392	136
32.0523	138
32.0654	112
32.0786	137
32.0917	127
32.1048	140
32.118	128
32.1311	113
32.1442	134
32.1574	124
32.1705	114
32.1836	100
32.1967	130
32.2099	124
32.223	137
32.2361	120
32.2493	128
32.2624	98
32.2755	120
32.2886	132
32.3018	121
32.3149	136
32.328	124
32.3412	114
32.3543	130
32.3674	117
32.3806	120
32.3937	127
32.4068	132
32.42	139
32.4331	116
32.4462	119
32.4594	131
32.4725	137
32.4856	115
32.4987	111
32.5119	141
32.525	116
32.5381	123
32.5513	140
32.5644	113
32.5775	131
32.5906	121
32.6038	132
32.6169	138
32.63	155
32.6432	128
32.6563	117
32.6694	118
32.6826	118
32.6957	138
32.7088	142
32.7219	134
32.7351	147
32.7482	131
32.7614	158
32.7745	128
32.7876	133
32.8007	143
32.8139	154
32.827	130
32.8401	144
32.8533	139
32.8664	159
32.8795	114
32.8927	115
32.9058	138
32.9189	119
32.932	137
32.9452	127
32.9583	142
32.9714	150
32.9846	144
32.9977	123
33.0108	126
33.0239	131
33.0371	139
33.0502	139
33.0633	131
33.0765	122
33.0896	142
33.1027	127
33.1159	142
33.129	124
33.1421	125
33.1553	129
33.1684	144
33.1815	160
33.1946	145
33.2078	140
33.2209	154
33.234	124
33.2472	152
33.2603	157
33.2734	172
33.2866	160
33.2997	146
33.3128	165
33.3259	139
33.3391	147
33.3522	177
33.3653	164
33.3785	163
33.3916	150
33.4047	151
33.4179	161
33.431	135
33.4441	149
33.4573	147
33.4704	140
33.4835	136
33.4966	128
33.5098	131
33.5229	123
33.536	117
33.5492	119
33.5623	148
33.5754	141
33.5885	105
33.6017	121
33.6148	109
33.6279	108
33.6411	128
33.6542	124
33.6673	123
33.6805	122
33.6936	127
33.7067	120
33.7199	137
33.733	106
33.7461	121
33.7593	135
33.7724	141
33.7855	132
33.7986	125
33.8118	126
33.8249	121
33.838	147
33.8512	127
33.8643	119
33.8774	125
33.8905	126
33.9037	118
33.9168	119
33.9299	129
33.9431	122
33.9562	133
33.9693	131
33.9825	132
33.9956	112
34.0087	104
34.0219	131
34.035	126
34.0481	111
34.0612	121
34.0744	123
34.0875	117
34.1006	120
34.1138	121
34.1269	124
34.14	118
34.1531	109
34.1663	108
34.1794	117
34.1925	105
34.2057	105
34.2188	120
34.2319	123
34.2451	104
34.2582	126
34.2713	110
34.2845	105
34.2976	116
34.3107	124
34.3239	124
34.337	111
34.3501	100
34.3632	115
34.3764	107
34.3895	121
34.4026	117
34.4158	122
34.4289	116
34.442	121
34.4552	113
34.4683	136
34.4814	109
34.4945	115
34.5077	108
34.5208	119
34.5339	101
34.5471	119
34.5602	102
34.5733	117
34.5864	106
34.5996	119
34.6127	96
34.6258	121
34.639	121
34.6521	106
34.6652	119
34.6784	117
34.6915	114
34.7046	120
34.7178	129
34.7309	110
34.744	89
34.7572	119
34.7703	121
34.7834	111
34.7965	108
34.8097	117
34.8228	105
34.8359	89
34.8491	102
34.8622	131
34.8753	109
34.8884	111
34.9016	106
34.9147	112
34.9278	106
34.941	118
34.9541	107
34.9672	110
34.9804	119
34.9935	119
35.0066	118
35.0198	109
35.0329	117
35.046	104
35.0591	116
35.0723	108
35.0854	104
35.0985	119
35.1117	114
35.1248	123
35.1379	91
35.1511	113
35.1642	117
35.1773	115
35.1904	108
35.2036	108
35.2167	111
35.2298	148
35.243	103
35.2561	107
35.2692	98
35.2824	108
35.2955	117
35.3086	119
35.3218	114
35.3349	115
35.348	96
35.3611	107
35.3743	85
35.3874	93
35.4005	107
35.4137	97
35.4268	103
35.4399	104
35.453	138
35.4662	113
35.4793	97
35.4924	110
35.5056	103
35.5187	120
35.5318	112
35.545	106
35.5581	104
35.5712	102
35.5844	109
35.5975	106
35.6106	91
35.6238	106
35.6369	101
35.65	118
35.6631	99
35.6763	117
35.6894	112
35.7025	99
35.7157	92
35.7288	95
35.7419	106
35.755	109
35.7682	115
35.7813	91
35.7944	117
35.8076	116
35.8207	99
35.8338	110
35.847	104
35.8601	95
35.8732	121
35.8864	100
35.8995	107
35.9126	100
35.9257	105
35.9389	101
35.952	96
35.9651	87
35.9783	102
35.9914	105
36.0045	92
36.0177	75
36.0308	112
36.0439	115
36.057	95
36.0702	112
36.0833	107
36.0964	94
36.1096	114
36.1227	96
36.1358	101
36.149	97
36.1621	97
36.1752	102
36.1883	87
36.2015	110
36.2146	109
[truncated: 3,334 more rows]
